1 **Shedding light on the control of CatSper Ca<sup>2+</sup> channels by cAMP and**  
2 **chemicals used to probe cAMP signaling**

3 Tao Wang<sup>1,2</sup>, Samuel Young<sup>2</sup>, Frank Tüttelmann<sup>3</sup>, Albrecht Röpke<sup>3</sup>, Claudia Krallmann<sup>2</sup>, Sabine  
4 Kliesch<sup>2</sup>, Xu-Hui Zeng<sup>1\*</sup>, Christoph Brenker<sup>2\*#</sup>, and Timo Strünker<sup>2,4\*#</sup>

5 **Affiliations:**

6 <sup>1</sup>Institute of Life Science and School of Life Science, Nanchang University, Nanchang, Jiangxi,  
7 PR China.

8 <sup>2</sup>Center of Reproductive Medicine and Andrology, University Hospital Münster, University of  
9 Münster, Münster, Germany.

10 <sup>3</sup>Institute of Human Genetics, University of Münster, Münster, Germany.

11 <sup>4</sup>Cells in Motion Interfaculty Centre, University of Münster, Münster, Germany.

12

13 \*To whom correspondence should be addressed. E-mail: [timo.struenker@ukmuenster.de](mailto:timo.struenker@ukmuenster.de);  
14 [christoph.brenker@ukmuenster.de](mailto:christoph.brenker@ukmuenster.de); [zengxuhui@ncu.edu.cn](mailto:zengxuhui@ncu.edu.cn).

15 #These authors contributed equally to this work.

16

17 **Abstract:** The sperm-specific CatSper channel controls the influx of Ca<sup>2+</sup> into the flagellum and,  
18 thereby, the swimming behavior of sperm. A hallmark of human CatSper is its polymodal  
19 activation by membrane voltage, intracellular pH, and oviductal hormones. Whether CatSper is  
20 also activated by signaling pathways involving an increase of cAMP and ensuing activation of  
21 protein kinase A (PKA) is, however, a matter of controversy. Here, using kinetic ion-sensitive  
22 fluorimetry and patch-clamp recordings, we study transmembrane Ca<sup>2+</sup> flux and membrane  
23 currents in human sperm from healthy donors and from patients that lack functional CatSper  
24 channels. We show that human CatSper is neither activated by intracellular cAMP directly nor  
25 indirectly by the cAMP/PKA-signaling pathway. Moreover, we demonstrate that non-  
26 physiological concentrations of cAMP and membrane-permeable cAMP analogs used to mimic  
27 the action of intracellular cAMP activate human CatSper from the outside via a previously  
28 unknown extracellular cyclic nucleotide-binding site. Finally, we demonstrate that the effects of  
29 common PKA inhibitors on human CatSper rest on off-target drug actions on CatSper itself

30 rather than on inhibition of PKA. We conclude that the concept of an intracellular cAMP/PKA-  
31 activation of CatSper is primarily based on unspecific effects of chemical probes used to  
32 interfere with cAMP signaling. Altogether, our findings solve several controversial issues, which  
33 has important bearings on future studies of cAMP and  $\text{Ca}^{2+}$  signaling and the ligand-control of  
34 CatSper in sperm.

## 35 **Introduction**

36 The CatSper channel (cation channel of sperm) represents the principal pathway for  $\text{Ca}^{2+}$  entry  
37 into the flagellum of sperm from many species (Kirichok et al., 2006; Lishko et al., 2011; Loux  
38 et al., 2013; Ren et al., 2001; Seifert et al., 2015; Strunker et al., 2011; Sumigama et al., 2015).  
39 The activity of CatSper is controlled by both the membrane potential ( $V_m$ ) and intracellular pH  
40 ( $\text{pH}_i$ ) (Hwang et al., 2019; Kirichok et al., 2006; Lishko et al., 2010; Lishko et al., 2011; Seifert  
41 et al., 2015; Strunker et al., 2011), and, in human sperm, also by oviductal steroids and  
42 prostaglandins (Brenker et al., 2018b; Lishko et al., 2011; Luo et al., 2019; Schiffer et al., 2020;  
43 Smith et al., 2013; Strunker et al., 2011; Williams et al., 2015). Thereby, CatSper translates  
44 changes of the chemical microenvironment into changes of  $[\text{Ca}^{2+}]_i$  and swimming behavior,  
45 which enables sperm to reach the site of fertilization, to overcome the egg's protective  
46 vestments, and, ultimately, to fertilize the egg (Achikanu et al., 2018; Alasmari et al., 2013;  
47 Oren-Benaroya et al., 2008; Ren et al., 2001; Rennhack et al., 2018; Schiffer et al., 2020;  
48 Tamburrino et al., 2014; Tamburrino et al., 2015). CatSper is, hence, absolutely required for  
49 fertilization in mice and humans (Avenarius et al., 2009; Avidan et al., 2003; Luo et al., 2019; Qi  
50 et al., 2007; Ren et al., 2001; Schiffer et al., 2020; Williams et al., 2015; Zhang et al., 2007).

51 Not only the control of  $[\text{Ca}^{2+}]_i$  by CatSper, but also the flagellar cAMP dynamics is key for the  
52 function of sperm (Akbari et al., 2019; Balbach et al., 2018; Buffone et al., 2014; Esposito et al.,

53 2004; Visconti et al., 1995). In mammalian sperm, cAMP is predominately synthesized by the  
54 soluble adenylyl cyclase (sAC) that is controlled by bicarbonate (Brenker et al., 2012; Buffone et  
55 al., 2014; Hess et al., 2005; Kleinboelting et al., 2014; Wennemuth et al., 2003b; Xie et al.,  
56 2006). Bicarbonate-induced synthesis of cAMP by sAC activates protein kinase A (PKA)  
57 (Buffone et al., 2014; Moseley et al., 2005); and the cAMP/PKA-signaling pathway controls the  
58 flagellar beat frequency and capacitation (Esposito et al., 2004; Hess et al., 2005; Morgan et al.,  
59 2008; Xie et al., 2006), a maturation process that primes sperm to fertilize the egg (Yanagimachi,  
60 1994).

61 The interplay of  $\text{Ca}^{2+}$  and cAMP in sperm is only ill-defined. In particular, it has remained  
62 controversial whether intracellular cAMP and/or activation of PKA stimulate  $\text{Ca}^{2+}$  influx via  
63 CatSper. It is unequivocal that membrane-permeable analogues of cAMP (e.g. 8-Br-cAMP) that  
64 are used to mimic the action of intracellular cAMP activate CatSper in both mouse and human  
65 sperm (Brenker et al., 2012; Orta et al., 2018; Ren et al., 2001; Xia et al., 2007). However, in a  
66 series of studies by independent groups, elevation of intracellular cAMP levels in mouse and  
67 human sperm by bicarbonate or other measures, including adenosine, synthetic adenosine- or  
68 catecholamine-receptor agonists, photorelease of cAMP from caged cAMP, or control of cAMP  
69 by optogenetics, failed to stimulate  $\text{Ca}^{2+}$  influx via CatSper (Brenker et al., 2012; Carlson et al.,  
70 2007; Carlson et al., 2003; Jansen et al., 2015; Nolan et al., 2004; Schuh et al., 2006; Strunker et  
71 al., 2011; Wennemuth et al., 2003a). These results indicate that mouse and human CatSper are  
72 neither activated by cAMP directly nor indirectly via activation of PKA, and that activation of  
73 CatSper by membrane-permeable cAMP derivatives might represent a non-specific action of  
74 these compounds in sperm. The latter is supported by the finding that membrane-permeable  
75 derivatives of cGMP (e.g. 8-Br-cGMP) activate human CatSper only from the outside (Brenker

76 et al., 2012). However, there are studies that contradict this concept and rather suggest a  
77 cAMP/PKA-activation of CatSper: in a study on human sperm, sizable bicarbonate-evoked  $\text{Ca}^{2+}$   
78 signals were recorded (Spehr et al., 2004). Moreover, in a recent study by Orta et al (Orta et al.,  
79 2018), both 8-Br-cAMP and bicarbonate evoked  $\text{Ca}^{2+}$  influx via CatSper in mouse sperm. The  
80  $\text{Ca}^{2+}$  influx by 8-Br-cAMP and bicarbonate was suppressed by inhibitors of PKA. Additionally,  
81 in patch-clamp recordings, CatSper-mediated membrane currents were enhanced by superfusion  
82 with bicarbonate and by cAMP in the pipette solution; inhibition of PKA suppressed the action  
83 of bicarbonate and intracellular cAMP. Based on these results, it was proposed that an increase  
84 of intracellular cAMP activates CatSper via activation of PKA (Orta et al., 2018).

85 Here, to solve this controversy, we studied the action of cAMP, membrane-permeable cAMP  
86 analogs, cAMP/PKA signaling, and PKA inhibitors in human sperm from healthy donors and  
87 patients that suffer from the deafness-infertility syndrome (DIS). In DIS patients, the *CATSPER2*  
88 gene is deleted (Avidan et al., 2003; Schiffer et al., 2020; Zhang et al., 2007), resulting in the  
89 loss of CatSper function (Brenker et al., 2018b; Schiffer et al., 2020; Smith et al., 2013). We  
90 demonstrate that human CatSper is neither activated by intracellular cAMP directly nor  
91 indirectly via activation of the cAMP/PKA-signaling pathway. In fact, membrane-permeable  
92 cAMP analogs and cAMP itself activate CatSper only from the outside via a so far unknown  
93 binding site that is distinct from that employed by steroids and prostaglandins. Furthermore, we  
94 found that several commonly used PKA inhibitors affect the activity of CatSper. The action of  
95 these drugs on CatSper does, however, not rest on the inhibition of PKA. Finally, we show that  
96 bicarbonate is prone to evoke artefactual alkaline-induced  $\text{Ca}^{2+}$  influx via CatSper that might be  
97 misinterpreted as cAMP/PKA-activation of the channel. Altogether, we conclude that the  
98 concept of a cAMP/PKA-activation of CatSper is rather based on chemical probes that are

99    unspecific and, therefore, ill-suited to study the interplay of  $\text{Ca}^{2+}$  - and cAMP-signaling pathways  
100    in sperm.

## 101    **Results**

### 102    *CatSper is not activated by intracellular cAMP or cAMP/PKA signaling*

103    To scrutinize whether CatSper is activated by intracellular cAMP or cAMP/PKA signaling, we  
104    studied the action of bicarbonate, IBMX, and adenosine in human sperm. Bicarbonate-activation  
105    of sAC rapidly increases cAMP (Fig. 1A) (Brenker et al., 2012) and activates PKA, i.e. cAMP  
106    levels and PKA activity peak within  $\leq 60$  s upon stimulation of sperm with bicarbonate  
107    (Battistone et al., 2013; Brenker et al., 2012). In sperm bathed in low concentrations of  
108    bicarbonate (e.g. 4 mM), isobutylmethylxanthine (IBMX) and adenosine evoke an increase of  
109    cAMP levels (Fig. 1A) (Brenker et al., 2012; Nolan et al., 2004; Schuh et al., 2006); IBMX and  
110    presumably also adenosine inhibit cAMP breakdown by phosphodiesterases (PDEs). However,  
111    neither bicarbonate nor IBMX or adenosine increased the intracellular  $\text{Ca}^{2+}$  concentration  
112    ( $[\text{Ca}^{2+}]_i$ ) of human sperm, whereas CatSper activation by progesterone as a control evoked a  
113    biphasic  $\text{Ca}^{2+}$  response (Fig. 1B, C). Next, we recorded CatSper currents from human sperm by  
114    whole-cell patch clamping. In extracellular solution containing  $\text{Ca}^{2+}$  and  $\text{Mg}^{2+}$ , we recorded only  
115    miniscule currents (Fig. 1D, E; HS); in  $\text{Na}^+$ -based divalent-free solution, the prototypical  
116    monovalent CatSper currents were recorded (Fig. 1D, E; NaDVF) (Lishko et al., 2011; Strunker  
117    et al., 2011). The current amplitudes were similar in the absence and presence of cAMP in the  
118    pipette solution (Fig. 1D, E): mean CatSper inward currents at -80 mV were  $-20.7 \pm 8.4$  pA (n =  
119    50) and  $-23.6 \pm 11.9$  pA (n = 16); mean outward currents at +80 mV were  $53.3 \pm 16.2$  pA (n =  
120    50) and  $58.7 \pm 21.4$  pA (n = 16), respectively. Together, these results demonstrate that human  
121    CatSper is neither directly activated by intracellular cAMP nor indirectly by activation of the

122 cAMP/PKA-signaling pathway (Brenker et al., 2012; Strunker et al., 2011). Of note, the  
123 intracellular cAMP level and activation of the cAMP/PKA-signaling pathways do not modulate  
124 stimulus-induced gating of human CatSper either: bicarbonate and IBMX did not affect CatSper  
125 activation by progesterone and simultaneous alkalization and depolarization (K8.6), respectively  
126 (Fig. 1H, I).

### 127 ***Bicarbonate is prone to evoke alkaline-induced $Ca^{2+}$ influx via CatSper***

128 In some studies on mouse and human sperm, sizeable bicarbonate-evoked  $Ca^{2+}$  signals were  
129 recorded (Orta et al., 2018; Spehr et al., 2004). We entertained several eventualities that might  
130 explain these seemingly contradictory findings. We identified the pH of bicarbonate-containing  
131 buffers as a potential source of artifacts: the pH of buffers containing bicarbonate is tied to the  
132 partial pressure of  $CO_2$  (Kohn and Dunlap, 1998) and, therefore, unstable at ambient conditions.  
133 To illustrate this issue, we monitored the pH of HTF exposed to ambient air in the absence and  
134 presence of bicarbonate, using a fluorescent pH indicator. In the absence of bicarbonate, the pH  
135 remained stable at pH 7.35 (Fig. 2A). In the presence of bicarbonate, due to continuous  
136 degassing of  $CO_2$ , the pH alkalinized to pH 7.9 with a time constant ( $\tau$ ) of about 40 min (Fig. 2A).  
137 In sperm loaded with a fluorescent pH indicator, air-exposed (> 60 min) bicarbonate-HTF  
138 evoked an alkalization of the intracellular pH ( $pH_i$ ) that was similar to the  $pH_i$  alkalization  
139 evoked by alkaline (pH 7.8) HTF lacking bicarbonate (HTF7.8) or by the weak base ammonium  
140 chloride ( $NH_4Cl$ ) (Fig. 2B); stimulation of sperm with pH-controlled bicarbonate-HTF rather  
141 acidified  $pH_i$  (Fig. 2B). It is well-established that an intracellular alkalization by HTF7.8 or  
142  $NH_4Cl$  evokes  $Ca^{2+}$  influx via CatSper (Fig. 2C, D) (Rennhack et al., 2018; Schiffer et al., 2020;  
143 Strunker et al., 2011). Therefore, it is not surprising that air-exposed bicarbonate-HTF also  
144 evokes a sizeable  $[Ca^{2+}]_i$  increase in human sperm (Fig. 2C, D). Thus, bicarbonate-evoked

145  $[Ca^{2+}]_i$  increases observed in mouse and human sperm might reflect alkaline- rather than  
146 cAMP/PKA-induced CatSper activation, caused by unintended alkalization of bicarbonate  
147 buffers.

#### 148 ***Membrane-permeable cAMP analogs activate CatSper only from the outside***

149 Next, considering that human CatSper is not activated by intracellular cAMP, we set out to  
150 elucidate the mechanism underlying the  $Ca^{2+}$  influx evoked by membrane-permeable cAMP  
151 analogs. To this end we studied the action of the most common cAMP analogs used to mimic the  
152 action of intracellular cAMP (8-CPT-cAMP, 8-Br-cAMP, Db-cAMP) or to activate PKA (6-  
153 Bnz-cAMP) or EPAC (8-pCPT-2-O-Me-cAMP-AM, i.e. 007-AM) (Schmidt et al., 2013). Any of  
154 these cAMP analogs evoked a biphasic  $[Ca^{2+}]_i$  increase, and the amplitude of the  $Ca^{2+}$  response  
155 rose in a dose-dependent fashion (Fig. 3A, B; Supplementary Fig. 1A). The potency of the  
156 cAMP analogs varied: 8-pCPT-2-O-Me-cAMP-AM and 8-CPT-cAMP increased  $[Ca^{2+}]_i$  already  
157 at micromolar concentrations, whereas the action of 8-Br-cAMP, Db-cAMP, and 6-Bnz-cAMP  
158 commenced only at  $\geq 1$  mM (Fig. 3B; Supplementary Fig. 1A). Because we used the  $Na^+$  salts of  
159 the cAMP analogs, we studied the action of NaCl as a surrogate for the vehicle. Only at  $> 10$   
160 mM, the vehicle evoked a small  $Ca^{2+}$  response on its own (Fig. 3B). To scrutinize whether the  
161  $[Ca^{2+}]_i$  increase evoked by cAMP analogs is mediated by CatSper, we studied their action in  
162 CatSper-deficient sperm from infertile patients that lack the *CATSPER2* gene (Brenker et al.,  
163 2018b; Schiffer et al., 2020). In CatSper-deficient sperm, the  $Ca^{2+}$  response evoked by 8-CPT-  
164 cAMP, 8-Br-cAMP, 6-Bnz-cAMP, and 8-pCPT-2-O-Me-cAMP-AM was abolished, and Db-  
165 cAMP evoked only a small residual  $Ca^{2+}$  signal (Fig. 3A; Supplementary Fig. 1A). Furthermore,  
166 in whole-cell patch-clamp recordings, superfusion of sperm with 8-CPT-cAMP enhanced  
167 monovalent currents at -80 mV and +80 mV by  $2.47 \pm 0.8$ -fold and by  $1.22 \pm 0.16$ -fold ( $n = 8$ ),

168 respectively, confirming that 8-CPT-cAMP activates CatSper. The vehicle had only a minuscule,  
169 if any, action on the amplitude of CatSper currents (Supplementary Fig. 1B-D); and in CatSper-  
170 deficient sperm, 8-CPT-cAMP did not affect residual monovalent currents. (Supplementary Fig.  
171 2A, B). These results demonstrate that CatSper is promiscuously activated by structurally and  
172 functionally diverse membrane-permeable analogs of cAMP. Of note, CatSper is not only  
173 activated by cAMP analogs, but also by analogs of cGMP such as 8-CPT-cGMP or 8-Br-cGMP  
174 (Supplementary Fig. 3A, B) (Brenker et al., 2012), which activate human CatSper only via an  
175 extracellular binding site (Brenker et al., 2012). We examined whether cAMP analogs activate  
176 CatSper by a similar mechanism. To this end, we first tested by  $\text{Ca}^{2+}$  fluorimetry whether  
177 CatSper might also be activated by extracellular application of cAMP itself, which hardly  
178 permeates the cell membrane. Indeed, not only its membrane-permeable analogs, but also cAMP  
179 (at  $\geq 1$  mM), evoked a  $[\text{Ca}^{2+}]_i$  increase in human sperm (Fig. 4A, B). The cAMP-evoked  $\text{Ca}^{2+}$   
180 response was abolished in sperm that lack functional CatSper (Fig. 4A). Next, we examined the  
181 kinetics of the  $\text{Ca}^{2+}$  signals evoked by 8-CPT-cAMP in a stopped-flow apparatus. Upon rapid  
182 mixing of sperm with 8-CPT-cAMP,  $[\text{Ca}^{2+}]_i$  rose with no measurable latency within the time  
183 resolution of the system (36 ms) (Fig. 4C, D). Finally, in patch-clamp recordings, superfusion of  
184 sperm with cAMP enhanced monovalent CatSper currents at -80 mV and +80 mV by  $1.58 \pm$   
185  $0.17$ -fold and by  $1.36 \pm 0.4$ -fold ( $n = 4$ ) (Fig. 5A-C), respectively. The presence of cAMP or 8-  
186 CPT-cAMP in the pipette solution did not suppress activation of CatSper by superfusion with 8-  
187 CPT-cAMP (Fig. 5D-I): 8-CPT-cAMP enhanced inward and outward currents by  $1.88 \pm 0.45$ -  
188 fold (-80 mV) and  $1.03 \pm 0.13$ -fold (+80 mV) ( $n = 8$ ) in the presence of cAMP ( $n = 8$ ); and by  
189  $1.86 \pm 0.2$ -fold (-80 mV) and  $1.04 \pm 0.08$ -fold (+80 mV) in the presence of 8-CPT-cAMP ( $n =$   
190 4). Altogether, the activation of CatSper by extracellular cAMP, the failure of intracellular



191 cAMP or 8-CPT-cAMP to suppress CatSper activation by superfusion with 8-CPT-cAMP, and  
192 the virtually instantaneous onset of 8-CPT-cAMP-evoked  $\text{Ca}^{2+}$  responses indicate that cAMP  
193 and membrane-permeable cAMP analogs activate CatSper only from the extracellular space.

194 ***Human CatSper is activated by cyclic nucleotides via a so far unknown binding site***

195 We wondered whether cyclic nucleotides compete with steroids and/or prostaglandins to activate  
196 CatSper.  $\text{Ca}^{2+}$ -fluorimetric cross-desensitization experiments revealed that steroids and  
197 prostaglandins employ different binding sites to activate human CatSper (Brenker et al., 2018b;  
198 McBrinn et al., 2019; Schaefer et al., 1998; Strunker et al., 2011). We used this approach to  
199 study the mechanism of cyclic nucleotide-induced CatSper activation. Validating our  
200 experimental conditions, pre-incubation of sperm with a saturating concentration of progesterone  
201 abolished the  $\text{Ca}^{2+}$  response evoked by 17-OH-progesterone, but not that evoked by  $\text{PGE}_1$  (Fig.  
202 6A, B); and pre-incubation with a saturating concentration of  $\text{PGE}_1$  abolished the  $\text{Ca}^{2+}$  response  
203 evoked by  $\text{PGE}_2$ , but not that evoked by progesterone (Fig. 6C, D). Pre-incubation with  
204 saturating concentration of progesterone or  $\text{PGE}_1$ , however, did not abolish  $\text{Ca}^{2+}$  responses  
205 evoked by cAMP, cAMP analogs, or cGMP analogs (Fig. 6A-D); vice versa, pre-incubation of  
206 sperm with 8-CPT-cAMP or 8-CPT-cGMP did not abolish progesterone- or  $\text{PGE}_1$ -evoked  $\text{Ca}^{2+}$   
207 responses (Fig. 6E-H). The lack of cross-desensitization demonstrates that cyclic nucleotides do  
208 not compete with progesterone or prostaglandins to activate CatSper. However, pre-incubation  
209 with 8-CPT-cAMP or 8-CPT-cGMP abolished the responses evoked by cAMP as well as by  
210 other analogs of cAMP or cGMP (Fig. 6E-G), indicating that cAMP, cAMP analogs, and cGMP  
211 analogs compete with each other to activate CatSper. Thus, cyclic nucleotides, steroids, and  
212 prostaglandins activate human CatSper via three distinct binding sites.

213 ***The action of PKA inhibitors on CatSper does not rest on inhibition of PKA***

214 Given that CatSper is not activated by cAMP/PKA signaling, how can inhibitors of PKA, i.e.  
215 H89 and PKI 14-22, suppress CatSper-mediated  $\text{Ca}^{2+}$  influx in human and mouse sperm (Baron  
216 et al., 2016; Orta et al., 2018). To solve this conundrum, we studied the action of the five most  
217 common pharmacological probes (i.e. PKI 5-24, Rp-cAMPS, KT 5720, H89, and PK 14-22) in  
218 human sperm. The action of these drugs was heterogeneous: PKI 5-24 and Rp-cAMPS affected  
219 neither resting  $\text{Ca}^{2+}$  levels nor CatSper-mediated  $\text{Ca}^{2+}$  influx evoked by 8-CPT-cAMP,  
220 progesterone,  $\text{PGE}_1$ , or alkalization ( $\text{NH}_4\text{Cl}$ ) (Fig. 7A-D). Similarly, KT 5720 did not suppress  
221 ligand- or alkaline-induced  $\text{Ca}^{2+}$  influx via CatSper (Fig. 7A-D). However, on its own, KT 5720  
222 evoked a small, transient  $[\text{Ca}^{2+}]_i$  increase that was abolished in CatSper-deficient human sperm  
223 (Fig. 7A, B; Supplementary Fig. 4A). In patch-clamp recordings from human sperm, KT 5720  
224 increased the amplitude of monovalent CatSper inward (-80 mV) and outward (+80 mV) currents  
225 by  $1.48 \pm 0.47$ -fold and  $1.33 \pm 0.11$ -fold, respectively (Fig. 7E, F,  $n = 5$ ). The action of H89 was  
226 particularly complex: H89 on its own evoked a transient  $\text{Ca}^{2+}$  increase, followed by a  $[\text{Ca}^{2+}]_i$   
227 decrease below resting levels (Fig. 8A, B). The dose-response relation for the  $\text{Ca}^{2+}$  transient was  
228 bell shaped, i.e. the signal amplitude grew with increasing concentrations, saturated at about 10  
229  $\mu\text{M}$ , and decreased again at  $>10 \mu\text{M}$  (Fig. 8B). The H89-evoked  $\text{Ca}^{2+}$  response was abolished in  
230 CatSper-deficient human sperm, indicating that H89 acts via CatSper (Supplementary Fig. 4A).  
231 Of note, in the presence of H89, both ligand- and alkaline-evoked  $\text{Ca}^{2+}$  influx via CatSper was  
232 strongly attenuated (Fig. 8C, D); and in patch-clamp recordings, H89 reversibly inhibited  
233 monovalent CatSper currents (Fig. 8E, F; Supplementary Fig. 4B). Finally, PKI 14-22 evoked a  
234 small decrease of  $[\text{Ca}^{2+}]_i$  on its own, which was abolished in CatSper-deficient sperm (Fig. 8A;  
235 Supplementary Fig. 4A). PKI 14-22 strongly attenuated alkaline-evoked  $\text{Ca}^{2+}$  influx via CatSper,

236 whereas ligand-evoked  $\text{Ca}^{2+}$  influx was only slightly suppressed (Fig. 8C, D). In patch-clamp  
237 recordings, PKI 14-22 inhibited monovalent CatSper currents (Supplementary Fig. 4C).  
238 In summary, H89 and PKI 14-22 indeed inhibit CatSper. This action rests, however, on a direct  
239 inhibition of CatSper itself rather than on inhibition of PKA: in patch-clamp recordings, both  
240 H89 and PKI 14-22 suppress basal CatSper currents recorded under conditions that do not foster  
241 PKA signaling. Moreover, H89 and PKI 14-22 suppress alkaline-evoked  $\text{Ca}^{2+}$  influx via CatSper,  
242 which does not involve activation of PKA. Thus, H89 and PKI 14-22 are not suited to study the  
243 interconnection of cAMP, PKA, and  $\text{Ca}^{2+}$  signaling in human sperm. In contrast to H89 and PKI  
244 14-22, KT 5720 rather activates the channel, which renders also KT 5720 ill-suited for studies of  
245 PKA and/or CatSper function in sperm. Of note, the nonspecific action of the PKA inhibitors on  
246 CatSper does not come as a surprise. In fact, these drugs are well known to be rather nonspecific  
247 (Murray, 2008).

## 248 **Discussion**

249 Our results reinforce the conclusion that human CatSper is not activated by intracellular cAMP  
250 or cAMP/PKA signaling (Brenker et al., 2012). In fact, the concept of a cAMP/PKA-activation  
251 of CatSper rests on pharmacological tools that are, across the board, prone to unspecific effects.  
252 First, if not properly controlled for pH, bicarbonate solutions can activate CatSper via an increase  
253 of  $\text{pH}_i$ . Second, the common PKA inhibitors H89 and PKI 14-22 directly block CatSper, whereas  
254 KT 5720 activates the channel. Finally, membrane-permeable analogs of cyclic nucleotides  
255 activate CatSper only via an extracellular binding site. These findings enlarge the list of drugs  
256 that are frequently used to interfere with sperm signaling, but directly affect CatSper. For  
257 example, the popular PLC and PDE inhibitors U73122 and trequensin, respectively, as well as a  
258 diverse array of synthetic chemicals evoke  $\text{Ca}^{2+}$  influx via CatSper (Brenker et al., 2012; Diao et

259 al., 2017; McBrinn et al., 2019; Schiffer et al., 2014; Tavares et al., 2013). By contrast,  
260 MDL12330A, an inhibitor of transmembrane ACs, and RU1968, a sigma-receptor agonist, both  
261 block CatSper (Brenker et al., 2012; Rennhack et al., 2018; Schiffer et al., 2014). Moreover, also  
262 inhibitors of EPAC, another cAMP effector that reportedly controls  $[Ca^{2+}]_i$  in sperm (Itzhakov et  
263 al., 2019; Lucchesi et al., 2016), directly act on CatSper. The EPAC inhibitors CE3F4, ESI 05,  
264 and HJC 0350 activate human CatSper, whereas ESI 09 blocks the channel (Supplementary Fig.  
265 5). Thus, the most common EPAC inhibitors are also not suited to investigate the role of EPAC  
266 in  $Ca^{2+}$ -signaling of sperm. Altogether, these results caution against rash interpretation in  
267 mechanistic terms of results derived from experiments with pharmacological tools that  
268 seemingly control  $[Ca^{2+}]_i$  and/or CatSper. Because of the miniscule flagellar volume, even  
269 minute changes in CatSper activity strongly affect  $[Ca^{2+}]_i$  and, thereby, downstream signaling  
270 events. Therefore, quite general, using pharmacological tools to study signaling in sperm  
271 requires careful assessment of potential off-target actions on CatSper.

272 We did not examine whether the off-target action of membrane-permeable cAMP/cGMP analogs  
273 and PKA inhibitors on CatSper are similar in human and mouse sperm. Examples of species-  
274 specific ligand actions on CatSper are steroids and prostaglandins that activate CatSper in human  
275 (Brenker et al., 2012; Lishko et al., 2011; Strunker et al., 2011), but not in mouse sperm  
276 (Tamburrino et al., 2015). Therefore, we cannot exclude that there are differences concerning the  
277 cAMP/PKA-activation of CatSper among species. However, H89 suppressed alkaline-induced  
278 membrane currents also in mouse sperm (Orta et al., 2018), suggesting that H89 also directly  
279 blocks mouse CatSper. Moreover, a large number of independent studies by different groups  
280 consistently provided no evidence that a rise of cAMP and ensuing PKA activation activates  
281 mouse CatSper (Carlson et al., 2007; Carlson et al., 2003; Jansen et al., 2015; Nolan et al., 2004;

282 Schuh et al., 2006; Wennemuth et al., 2003a). Together, this comprehensive body of evidence  
283 strongly suggests that also mouse CatSper is not directly activated by intracellular cAMP/PKA  
284 signaling.

285 Of note, the activity of CatSper is remodeled during the capacitation process: the voltage  
286 dependence of CatSper shifts to more negative potentials (Lishko et al., 2011), and human  
287 CatSper becomes more sensitive to progesterone and prostaglandins (Bedu-Addo et al., 2005;  
288 Strunker et al., 2011). The underlying mechanism(s) are unknown, but might involve  
289 capacitation-associated remodeling of the membrane-lipid environment (Kawai et al., 2019),  
290 intracellular pH (Puga Molina et al., 2018), and/or  $V_m$  (Puga Molina et al., 2018) rather than  
291 cAMP signaling.

292 In the past decade, a picture has emerged that human CatSper serves as a polymodal  
293 chemosensor that translates the chemical code of the oviductal environment to changes in  $[Ca^{2+}]_i$   
294 and motility (Alasmari et al., 2013; Brenker et al., 2012; Brenker et al., 2018b; Diao et al., 2014;  
295 Diao et al., 2017; Lishko et al., 2011; Strunker et al., 2011; Williams et al., 2015). Oviductal  
296 steroids and prostaglandins activate CatSper in a highly synergistic fashion (Brenker et al.,  
297 2018a) via two distinct binding sites (Lishko et al., 2011; McBrinn et al., 2019; Schaefer et al.,  
298 1998; Strunker et al., 2011). Progesterone has been proposed to activate human CatSper via the  
299 receptor alpha/beta hydrolase domain-containing protein 2 (ABHD2) (Miller et al., 2016). By  
300 contrast, the mechanism of CatSper activation by prostaglandins is elusive, except that it does  
301 not involve ABHD2, classical G protein-coupled receptors, and second messengers (Brenker et  
302 al., 2012; Brenker et al., 2018c; Lishko et al., 2011; McBrinn et al., 2019; Miller et al., 2016;  
303 Schaefer et al., 1998; Strunker et al., 2011). Our results demonstrate that CatSper is also  
304 controlled by an extracellular binding site that accommodates neither steroids nor prostaglandins,

305 but cyclic nucleotides. Yet, extracellular cAMP activates CatSper only at concentrations  $\geq 1$   
306 mM, which exceeds physiological extracellular cAMP concentrations by several orders of  
307 magnitude. This indicates that the true physiological ligand of the cyclic nucleotide-binding site  
308 is to be deorphanized. Moreover, future studies are required to elucidate the molecular identity of  
309 this novel binding site, and it needs to be examined whether activation of CatSper via this third  
310 binding site evokes motility responses that are similar or distinct to that evoked by steroids or  
311 prostaglandins.

## 312 **Materials and Methods**

313 **Reagents.** cAMP, cGMP, and their derivatives (sodium salts) were obtained from BIOLOG Life  
314 Science Institute (Bremen, Germany). 8-pCPT-2-O-Me-cAMP-AM, H89 dihydrochloride, PKI  
315 14-22 amide myristoylated, ESI 09, CE3F4, HJC 0350, and ESI 05 were from Tocris  
316 (Minnesota, USA). Prostaglandin E<sub>1</sub> (PGE<sub>1</sub>), Prostaglandin E<sub>2</sub> (PGE<sub>2</sub>), and PKI 5-24 were  
317 obtained from Cayman (Hamburg, Germany). Fluo-4-AM, pHrodo Red-AM, and BCECF were  
318 obtained from Invitrogen (California, USA). Human serum albumin (HSA) was obtained from  
319 Irvine Scientific (Santa Ana, USA). All other chemicals were from Sigma-Aldrich.

320 **Human sperm preparation.** Semen samples were obtained from volunteers and DIS patients  
321 with prior written consent, under approval from the ethical committees of the medical association  
322 Westfalen-Lippe and the medical faculty of the University of Münster (4INie). Semen samples  
323 were produced by masturbation and ejaculated into plastic containers. The samples were allowed  
324 to liquefy for 15~30 min at 37°C and motile sperm were purified by a swim-up procedure:  
325 liquefied semen (0.5–1 ml) was directly layered in a 50 ml falcon tube below 4 ml of human  
326 tubal fluid (HTF) medium, containing (in mM): 97.8 NaCl, 4.69 KCl, 0.2 MgSO<sub>4</sub>, 0.37 KH<sub>2</sub>PO<sub>4</sub>,  
327 2.04 CaCl<sub>2</sub>, 0.33 Na-pyruvate, 21.4 lactic acid, 4 NaHCO<sub>3</sub>, 2.78 glucose, and 21 HEPES, pH

328 7.35 (adjusted with NaOH). Alternatively, the liquefied semen was diluted 1:10 with HTF, and  
329 sperm, somatic cells, and cell debris were pelleted by centrifugation at 700g for 20 min (37°C).  
330 The pellet was resuspended in the same volume HTF, 50 ml falcon tubes were filled with 5 ml of  
331 the suspension, and cells were pelleted by centrifugation at 700 g for 5 min (37°C). In both  
332 cases, motile sperm were allowed to swim up into HTF for 60–90 min at 37 °C. Sperm were  
333 washed two times (700g, 20 min, 37°C) and re-suspended in HTF containing 3 mg/ml HSA at a  
334 density of  $1 \times 10^7$  sperm/ml for measurement of changes in intracellular  $\text{Ca}^{2+}$ , pH, or cAMP as  
335 well as for patch-clamp recordings. To study the action of bicarbonate, sperm were purified by  
336 swim-up in HTF medium lacking  $\text{NaHCO}_3$ , which was substituted with NaCl. Sperm were  
337 washed two times (700g, 20 min, 37°C) and re-suspended in bicarbonate-free HTF containing 3  
338 mg/ml HSA.

339 **Measurement of changes in  $[\text{Ca}^{2+}]_i$  and pH.** Changes in  $[\text{Ca}^{2+}]_i$  and  $\text{pH}_i$  were measured in  
340 sperm loaded with the fluorescent  $\text{Ca}^{2+}$  and pH indicator, Fluo-4-AM and pHrodo Red-AM,  
341 respectively, at 30°C in 384 multi-well plates in a fluorescence plate reader (Fluostar Omega,  
342 BMG Labtech, Ortenberg, Germany) (Strunker et al., 2011). Sperm were loaded with Fluo-4-  
343 AM (5  $\mu\text{M}$ , 20 min) and pHrodo Red-AM (5  $\mu\text{M}$ , 30 min) at 37°C in the presence of Pluronic F-  
344 127 (0.05% w/v). After incubation, excess dye was removed by centrifugation (700g, 5 min,  
345 room temperature). Sperm were resuspended in HTF at a concentration of  $5 \times 10^6$ /ml. The wells  
346 were filled with 50  $\mu\text{l}$  of the sperm suspension and the fluorescence was excited at 480 nm (Fluo-  
347 4, pHrodo Red) and fluorescence emission was recorded at 520 nm. Changes in Fluo-4 and  
348 pHrodo Red fluorescence are depicted as  $\Delta F/F_0$  (%), that is, the change in fluorescence ( $\Delta F$ )  
349 relative to the mean basal fluorescence ( $F_0$ ) before application of buffer or stimuli (25  $\mu\text{l}$ ), to  
350 correct for intra- and inter-experimental variations in basal fluorescence among individual wells.



351 To study the action of bicarbonate, wells were filled with 40  $\mu$ l of the sperm suspension in  
352 bicarbonate-free HTF and 40  $\mu$ l of HTF containing 50 mM bicarbonate were injected. Of note,  
353 the bicarbonate-HTF was stored in air-tight tubes filled to capacity to avoid alkalization due to  
354 exposure to room air. Moreover, right prior to the experiments, the pH was checked again and, if  
355 required, (re)adjusted. To measure  $\text{Ca}^{2+}$  signals evoked by simultaneous  
356 alkalization/depolarization, wells were filled with 40  $\mu$ l of the sperm suspension and 40  $\mu$ l of  
357 K8.6 solution, containing (in mM): 98.5 KCl, 0.2  $\text{MgSO}_4$ , 0.37  $\text{KH}_2\text{PO}_4$ , 2.04  $\text{CaCl}_2$ , 21.4 lactic  
358 acid, 4  $\text{KHCO}_3$ , 2.78 glucose, and 21 HEPES, pH 9.3 (adjusted with KOH), was injected; the  
359 final pH in the well was 8.6. To measure the pH change of HTF containing 50 mM  $\text{NaHCO}_3$   
360 exposed to room air, 5  $\mu$ M BCECF was used. The wells were filled with 50  $\mu$ l HTF and BCECF  
361 was excited at 440 and 480 nm (dual excitation, BCECF) and the emission was recorded at 520  
362 nm over 2 hours. Changes in BCECF-fluorescence ratio (R, 480/440 nm) are depicted as  $\Delta R/R$   
363 (%), that is, the change in ratio ( $\Delta R$ ) relative to the mean ratio (R0) measured within the first  
364 minute of the recording.

365 Stopped-flow experiments were performed as described before (Brenker et al., 2012; Strunker et  
366 al., 2011) with some modifications (see also (Hamzeh et al., 2019)). Briefly, In a SFM-400  
367 stopped-flow device (Bio-Logic, France), a suspension of Fluo-4-loaded sperm ( $1 \times 10^7/\text{ml}$ ) in  
368 HTF was rapidly mixed (1:1; flow rate = 1 ml/s) with HTF containing 10 mM 8-CPT-cAMP.  
369 Fluorescence was excited with a blue light-emitting diode (LED; M470D2, Thorlabs, Germany;  
370 powered with a custom-made power supply) that was modulated at 10 kHz using a function  
371 generator (4060MV, PeakTech, Germany). The light was passed through a 475/28 nm excitation  
372 filter (Semrock, Buffalo NY, USA). Emission was passed through a 536/40 nm filter (Semrock)  
373 and recorded with a photomultiplier (H9656-20; Hamamatsu Photonics, Hamamatsu, Japan).



374 Signals were amplified with a lock-in amplifier (MFLI, Signal Zürich Instruments, Switzerland)  
375 and recorded with a data acquisition pad (PCI-6221; National Instruments, Germany) and  
376 BioKine software v. 4.49 (Bio-Logic).

377 **Electrophysiology.** We recorded CatSper currents from human sperm in the whole-cell  
378 configuration, as described before (Strunker et al., 2011). Seals between pipette and sperm were  
379 formed either at the cytoplasmic droplet or in the neck region in solution (HS) containing (in  
380 mM): 135 NaCl, 5 KCl, 1 MgSO<sub>4</sub>, 2 CaCl<sub>2</sub>, 5 glucose, 1 Na-pyruvate, 10 lactic acid, 20 HEPES,  
381 adjusted to pH 7.4 with NaOH. Monovalent CatSper currents were recorded in a sodium-based  
382 divalent-free solution (NaDVF) containing (in mM): 140 NaCl, 40 HEPES, and 1 EGTA,  
383 adjusted to pH 7.4 with NaOH. The osmolarity of HS and NaDVF solution was approximately  
384 320 mOsm. The pipette (10–15 MΩ) solution contained (in mM): 130 Cs-aspartate, 50 HEPES, 5  
385 EGTA, 5 CsCl, adjusted to pH 7.3 with CsOH. The pipette solution was approximately 325  
386 mOsm. To examine the effect of intracellular cAMP on CatSper, cAMP was dissolved in the  
387 pipette solution. The action of extracellular application of H89 (50 mM stock in DMSO), KT  
388 5720 (20 mM stock in DMSO), PKI 14-22 (800 μM stock in water) was examined by diluting  
389 the stocks with NaDVF; 8-CPT-cAMP was directly dissolved at 5 mM in NaDVF. All  
390 experiments were performed at room temperature (21–25°C). Data were not corrected for liquid  
391 junction potentials.

392 **Measurement of intracellular cAMP content.** To examine the action of adenosine and IBMX,  
393 308 μl of sperm in HTF at a density of  $2 \times 10^7$  cells/ml ( $6 \times 10^6$  cells in total) were mixed with  
394 32 μl of HTF containing adenosine or IBMX to reach a final concentration of (in mM): 0.1  
395 adenosine and 0.5 IBMX. To examine the action of bicarbonate, 154 μl of sperm in bicarbonate-  
396 free HTF at a density of  $4 \times 10^7$  cells/ml ( $6 \times 10^6$  cells in total) were mixed with 154 μl HTF

397 containing 46 mM NaHCO<sub>3</sub> and 32 µl of HTF containing 25 mM NaHCO<sub>3</sub>. After mixing with  
398 the respective stimulus, the samples were incubated for 30 min at 37°C, followed by the addition  
399 of 18 µl of 5 M HCl (0.25 M final concentration) to quench the biochemical reactions. After  
400 incubation for 30 min at room temperature, cell debris was sedimented by centrifugation at 3,000  
401 g for 5 min at room temperature. The cAMP concentration in the supernatant was determined by  
402 a competitive enzyme immunoassay according to the product manual (Catalog #: ADI-900-066,  
403 Enzo Life Sciences), including acetylation of cAMP. Calibration curves were obtained by serial  
404 dilutions of cAMP standards (acetylated format).

405 **Data analysis.** All data are given as mean ± SD.

406

#### 407 **References and Notes:**

- 408 Achikanu, C., Pendekanti, V., Teague, R., and Publicover, S. (2018). Effects of pH manipulation, CatSper  
409 stimulation and Ca<sup>2+</sup>-store mobilization on [Ca<sup>2+</sup>]<sub>i</sub> and behaviour of human sperm. *Hum Reprod* 33, 1802-  
410 1811.
- 411 Akbari, A., Pipitone, G.B., Anvar, Z., Jaafarinia, M., Ferrari, M., Carrera, P., and Totonchi, M. (2019). ADCY10  
412 frameshift variant leading to severe recessive asthenozoospermia and segregating with absorptive hypercalciuria.  
413 *Hum Reprod* 34, 1155-1164.
- 414 Alasmari, W., Costello, S., Correia, J., Oxenham, S.K., Morris, J., Fernandes, L., Ramalho-Santos, J., Kirkman-  
415 Brown, J., Michelangeli, F., Publicover, S., *et al.* (2013). Ca<sup>2+</sup> signals generated by CatSper and Ca<sup>2+</sup> stores  
416 regulate different behaviors in human sperm. *J Biol Chem* 288, 6248-6258.
- 417 Avenarius, M.R., Hildebrand, M.S., Zhang, Y., Meyer, N.C., Smith, L.L., Kahrizi, K., Najmabadi, H., and Smith,  
418 R.J. (2009). Human male infertility caused by mutations in the CATSPER1 channel protein. *Am J Hum Genet*  
419 84, 505-510.
- 420 Avidan, N., Tamary, H., Dgany, O., Cattan, D., Pariente, A., Thulliez, M., Borot, N., Moati, L., Barthelme, A.,  
421 Shalmon, L., *et al.* (2003). CATSPER2, a human autosomal nonsyndromic male infertility gene. *Eur J Hum*  
422 *Genet* 11, 497-502.
- 423 Balbach, M., Beckert, V., Hansen, J.N., and Wachten, D. (2018). Shedding light on the role of cAMP in mammalian  
424 sperm physiology. *Mol Cell Endocrinol* 468, 111-120.
- 425 Baron, L., Fara, K., Zapata-Carmona, H., Zuniga, L., Kong, M., Signorelli, J., Diaz, E.S., and Morales, P. (2016).  
426 Participation of protein kinases and phosphatases in the progesterone-induced acrosome reaction and calcium  
427 influx in human spermatozoa. *Andrology* 4, 1073-1083.
- 428 Battistone, M.A., Da Ros, V.G., Salicioni, A.M., Navarrete, F.A., Krapf, D., Visconti, P.E., and Cuasnicu, P.S.  
429 (2013). Functional human sperm capacitation requires both bicarbonate-dependent PKA activation and down-  
430 regulation of Ser/Thr phosphatases by Src family kinases. *Mol Hum Reprod* 19, 570-580.
- 431 Bedu-Addo, K., Lefievre, L., Moseley, F.L., Barratt, C.L., and Publicover, S.J. (2005). Bicarbonate and bovine  
432 serum albumin reversibly 'switch' capacitation-induced events in human spermatozoa. *Mol Hum Reprod* 11, 683-  
433 691.
- 434 Brenker, C., Goodwin, N., Weyand, I., Kashikar, N.D., Naruse, M., Krahling, M., Muller, A., Kaupp, U.B., and  
435 Strunker, T. (2012). The CatSper channel: a polymodal chemosensor in human sperm. *The EMBO journal* 31,  
436 1654-1665.

- 437 Brenker, C., Rehfeld, A., Schiffer, C., Kierzek, M., Kaupp, U.B., Skakkebaek, N.E., and Strunker, T. (2018a).  
438 Synergistic activation of CatSper Ca<sup>2+</sup> channels in human sperm by oviductal ligands and endocrine disrupting  
439 chemicals. *Hum Reprod* 33, 1915-1923.
- 440 Brenker, C., Schiffer, C., Wagner, I.V., Tuttelmann, F., Ropke, A., Rennhack, A., Kaupp, U.B., and Strunker, T.  
441 (2018b). Action of steroids and plant triterpenoids on CatSper Ca<sup>2+</sup> channels in human sperm. *P Natl Acad Sci*  
442 *USA* 115, E344-E346.
- 443 Brenker, C., Schiffer, C., Wagner, I.V., Tuttelmann, F., Ropke, A., Rennhack, A., Kaupp, U.B., and Strunker, T.  
444 (2018c). Action of steroids and plant triterpenoids on CatSper Ca(2+) channels in human sperm. *Proceedings of*  
445 *the National Academy of Sciences of the United States of America* 115, E344-E346.
- 446 Buffone, M.G., Wertheimer, E.V., Visconti, P.E., and Krapf, D. (2014). Central role of soluble adenylyl cyclase and  
447 cAMP in sperm physiology. *Bba-Mol Basis Dis* 1842, 2610-2620.
- 448 Carlson, A.E., Hille, B., and Babcock, D.F. (2007). External Ca<sup>2+</sup> acts upstream of adenylyl cyclase SACY in the  
449 bicarbonate signaled activation of sperm motility. *Developmental Biology* 312, 183-192.
- 450 Carlson, A.E., Westenbroek, R.E., Quill, T., Ren, D., Clapham, D.E., Hille, B., Garbers, D.L., and Babcock, D.F.  
451 (2003). CatSper1 required for evoked Ca<sup>2+</sup> entry and control of flagellar function in sperm. *Proc Natl Acad Sci*  
452 *U S A* 100, 14864-14868.
- 453 Diao, R., Fok, K.L., Chen, H., Yu, M.K., Duan, Y., Chung, C.M., Li, Z., Wu, H., Li, Z., Zhang, H., *et al.* (2014).  
454 Deficient human beta-defensin 1 underlies male infertility associated with poor sperm motility and genital tract  
455 infection. *Sci Transl Med* 6, 249ra108.
- 456 Diao, R., Wang, T., Fok, K.L., Li, X., Ruan, Y., Yu, M.K., Cheng, Y., Chen, Y., Chen, H., Mou, L., *et al.* (2017).  
457 CCR6 is required for ligand-induced CatSper activation in human sperm. *Oncotarget* 8, 91445-91458.
- 458 Esposito, G., Jaiswal, B.S., Xie, F., Krajnc-Franken, M.A., Robben, T.J., Strik, A.M., Kuil, C., Philipsen, R.L., van  
459 Duin, M., Conti, M., *et al.* (2004). Mice deficient for soluble adenylyl cyclase are infertile because of a severe  
460 sperm-motility defect. *Proc Natl Acad Sci U S A* 101, 2993-2998.
- 461 Hamzeh, H., Alvarez, L., Strunker, T., Kierzek, M., Brenker, C., Deal, P.E., Miller, E.W., Seifert, R., and Kaupp,  
462 U.B. (2019). Kinetic and photonic techniques to study chemotactic signaling in sea urchin sperm. *Methods Cell*  
463 *Biol* 151, 487-517.
- 464 Hess, K.C., Jones, B.H., Marquez, B., Chen, Y., Ord, T.S., Kamenetsky, M., Miyamoto, C., Zippin, J.H., Kopf,  
465 G.S., Suarez, S.S., *et al.* (2005). The "soluble" adenylyl cyclase in sperm mediates multiple signaling events  
466 required for fertilization. *Dev Cell* 9, 249-259.
- 467 Hwang, J.Y., Mannowetz, N., Zhang, Y., Everley, R.A., Gygi, S.P., Bewersdorf, J., Lishko, P.V., and Chung, J.J.  
468 (2019). Dual Sensing of Physiologic pH and Calcium by EFCAB9 Regulates Sperm Motility. *Cell* 177, 1480-  
469 1494 e1419.
- 470 Itzhakov, D., Nitzan, Y., and Breitbart, H. (2019). Protein kinase A inhibition induces EPAC-dependent acrosomal  
471 exocytosis in human sperm. *Asian J Androl* 21, 337-344.
- 472 Jansen, V., Alvarez, L., Balbach, M., Strunker, T., Hegemann, P., Kaupp, U.B., and Wachten, D. (2015).  
473 Controlling fertilization and cAMP signaling in sperm by optogenetics. *eLife* 4.
- 474 Kawai, T., Miyata, H., Nakanishi, H., Sakata, S., Morioka, S., Sasaki, J., Watanabe, M., Sakimura, K., Fujimoto, T.,  
475 Sasaki, T., *et al.* (2019). Polarized PtdIns(4,5)P<sub>2</sub> distribution mediated by a voltage-sensing phosphatase (VSP)  
476 regulates sperm motility. *Proc Natl Acad Sci U S A* 116, 26020-26028.
- 477 Kirichok, Y., Navarro, B., and Clapham, D.E. (2006). Whole-cell patch-clamp measurements of spermatozoa reveal  
478 an alkaline-activated Ca<sup>2+</sup> channel. *Nature* 439, 737-740.
- 479 Kleinboelting, S., van den Heuvel, J., and Steegborn, C. (2014). Structural analysis of human soluble adenylyl  
480 cyclase and crystal structures of its nucleotide complexes-implications for cyclase catalysis and evolution. *FEBS*  
481 *J* 281, 4151-4164.
- 482 Kohn, R.A., and Dunlap, T.F. (1998). Calculation of the buffering capacity of bicarbonate in the rumen and in vitro.  
483 *J Anim Sci* 76, 1702-1709.
- 484 Lishko, P.V., Botchkina, I.L., Fedorenko, A., and Kirichok, Y. (2010). Acid extrusion from human spermatozoa is  
485 mediated by flagellar voltage-gated proton channel. *Cell* 140, 327-337.
- 486 Lishko, P.V., Botchkina, I.L., and Kirichok, Y. (2011). Progesterone activates the principal Ca<sup>2+</sup> channel of human  
487 sperm. *Nature* 471, 387-391.
- 488 Loux, S.C., Crawford, K.R., Ing, N.H., Gonzalez-Fernandez, L., Macias-Garcia, B., Love, C.C., Varner, D.D.,  
489 Velez, I.C., Choi, Y.H., and Hinrichs, K. (2013). CatSper and the relationship of hyperactivated motility to  
490 intracellular calcium and pH kinetics in equine sperm. *Biol Reprod* 89, 123.

- 491 Lucchesi, O., Ruete, M.C., Bustos, M.A., Quevedo, M.F., and Tomes, C.N. (2016). The signaling module  
492 cAMP/Epac/Rap1/PLCepsilon/IP3 mobilizes acrosomal calcium during sperm exocytosis. *Biochim Biophys*  
493 *Acta* 1863, 544-561.
- 494 Luo, T., Chen, H.Y., Zou, Q.X., Wang, T., Cheng, Y.M., Wang, H.F., Wang, F., Jin, Z.L., Chen, Y., Weng, S.Q., *et*  
495 *al.* (2019). A novel copy number variation in CATSPER2 causes idiopathic male infertility with normal semen  
496 parameters. *Hum Reprod* 34, 414-423.
- 497 McBrinn, R.C., Fraser, J., Hope, A.G., Gray, D.W., Barratt, C.L.R., Martins da Silva, S.J., and Brown, S.G. (2019).  
498 Novel pharmacological actions of trequinsin hydrochloride improve human sperm cell motility and function. *Br*  
499 *J Pharmacol* 176, 4521-4536.
- 500 Miller, M.R., Mallowitz, N., Iavarone, A.T., Safavi, R., Gracheva, E.O., Smith, J.F., Hill, R.Z., Bautista, D.M.,  
501 Kirichok, Y., and Lishko, P.V. (2016). Unconventional endocannabinoid signaling governs sperm activation via  
502 the sex hormone progesterone. *Science* 352, 555-559.
- 503 Morgan, D.J., Weisenhaus, M., Shum, S., Su, T., Zheng, R., Zhang, C., Shokat, K.M., Hille, B., Babcock, D.F., and  
504 McKnight, G.S. (2008). Tissue-specific PKA inhibition using a chemical genetic approach and its application to  
505 studies on sperm capacitation. *Proc Natl Acad Sci U S A* 105, 20740-20745.
- 506 Moseley, F.L., Jha, K.N., Bjorndahl, L., Brewis, I.A., Publicover, S.J., Barratt, C.L., and Lefievre, L. (2005). Protein  
507 tyrosine phosphorylation, hyperactivation and progesterone-induced acrosome reaction are enhanced in IVF  
508 media: an effect that is not associated with an increase in protein kinase A activation. *Mol Hum Reprod* 11, 523-  
509 529.
- 510 Murray, A.J. (2008). Pharmacological PKA inhibition: all may not be what it seems. *Sci Signal* 1, re4.
- 511 Nolan, M.A., Babcock, D.F., Wennemuth, G., Brown, W., Burton, K.A., and McKnight, G.S. (2004). Sperm-  
512 specific protein kinase A catalytic subunit Calpha2 orchestrates cAMP signaling for male fertility. *Proc Natl*  
513 *Acad Sci U S A* 101, 13483-13488.
- 514 Oren-Benaroya, R., Orvieto, R., Gakamsky, A., Pinchasov, M., and Eisenbach, M. (2008). The sperm  
515 chemoattractant secreted from human cumulus cells is progesterone. *Hum Reprod* 23, 2339-2345.
- 516 Orta, G., de la Vega-Beltran, J.L., Martin-Hidalgo, D., Santi, C.M., Visconti, P.E., and Darszon, A. (2018). CatSper  
517 channels are regulated by protein kinase A. *J Biol Chem* 293, 16830-16841.
- 518 Puga Molina, L.C., Luque, G.M., Balestrini, P.A., Marin-Briggiler, C.I., Romarowski, A., and Buffone, M.G.  
519 (2018). Molecular Basis of Human Sperm Capacitation. *Front Cell Dev Biol* 6, 72.
- 520 Qi, H., Moran, M.M., Navarro, B., Chong, J.A., Krapivinsky, G., Krapivinsky, L., Kirichok, Y., Ramsey, I.S., Quill,  
521 T.A., and Clapham, D.E. (2007). All four CatSper ion channel proteins are required for male fertility and sperm  
522 cell hyperactivated motility. *Proc Natl Acad Sci U S A* 104, 1219-1223.
- 523 Ren, D., Navarro, B., Perez, G., Jackson, A.C., Hsu, S., Shi, Q., Tilly, J.L., and Clapham, D.E. (2001). A sperm ion  
524 channel required for sperm motility and male fertility. *Nature* 413, 603-609.
- 525 Rennhack, A., Schiffer, C., Brenker, C., Fridman, D., Nitao, E.T., Cheng, Y.M., Tamburrino, L., Balbach, M.,  
526 Stolting, G., Berger, T.K., *et al.* (2018). A novel cross-species inhibitor to study the function of CatSper Ca(2+)  
527 channels in sperm. *Br J Pharmacol* 175, 3144-3161.
- 528 Schaefer, M., Hofmann, T., Schultz, G., and Gudermann, T. (1998). A new prostaglandin E receptor mediates  
529 calcium influx and acrosome reaction in human spermatozoa. *Proc Natl Acad Sci U S A* 95, 3008-3013.
- 530 Schiffer, C., Muller, A., Egeberg, D.L., Alvarez, L., Brenker, C., Rehfeld, A., Frederiksen, H., Waschle, B., Kaupp,  
531 U.B., Balbach, M., *et al.* (2014). Direct action of endocrine disrupting chemicals on human sperm. *EMBO Rep*  
532 *15*, 758-765.
- 533 Schiffer, C., Rieger, S., Brenker, C., Young, S., Hamzeh, H., Wachten, D., Tuttelmann, F., Ropke, A., Kaupp, U.B.,  
534 Wang, T., *et al.* (2020). Rotational motion and rheotaxis of human sperm do not require functional CatSper  
535 channels and transmembrane Ca(2+) signaling. *The EMBO journal*, e102363.
- 536 Schmidt, M., Dekker, F.J., and Maarsingh, H. (2013). Exchange protein directly activated by cAMP (epac): a  
537 multidomain cAMP mediator in the regulation of diverse biological functions. *Pharmacol Rev* 65, 670-709.
- 538 Schuh, S.M., Carlson, A.E., McKnight, G.S., Conti, M., Hille, B., and Babcock, D.F. (2006). Signaling pathways for  
539 modulation of mouse sperm motility by adenosine and catecholamine agonists. *Biol Reprod* 74, 492-500.
- 540 Seifert, R., Flick, M., Bonigk, W., Alvarez, L., Trotschel, C., Poetsch, A., Muller, A., Goodwin, N., Pelzer, P.,  
541 Kashikar, N.D., *et al.* (2015). The CatSper channel controls chemosensation in sea urchin sperm. *The EMBO*  
542 *journal* 34, 379-392.
- 543 Smith, J.F., Syritsyna, O., Fellous, M., Serres, C., Mallowitz, N., Kirichok, Y., and Lishko, P.V. (2013). Disruption  
544 of the principal, progesterone-activated sperm Ca2+ channel in a CatSper2-deficient infertile patient. *Proc Natl*  
545 *Acad Sci U S A* 110, 6823-6828.

546 Spehr, M., Schwane, K., Riffell, J.A., Barbour, J., Zimmer, R.K., Neuhaus, E.M., and Hatt, H. (2004). Particulate  
547 adenylyl cyclase plays a key role in human sperm olfactory receptor-mediated chemotaxis. *J Biol Chem* 279,  
548 40194-40203.

549 Strunker, T., Goodwin, N., Brenker, C., Kashikar, N.D., Weyand, I., Seifert, R., and Kaupp, U.B. (2011). The  
550 CatSper channel mediates progesterone-induced Ca<sup>2+</sup> influx in human sperm. *Nature* 471, 382-386.

551 Sumigama, S., Mansell, S., Miller, M., Lishko, P.V., Cherr, G.N., Meyers, S.A., and Tollner, T. (2015).  
552 Progesterone Accelerates the Completion of Sperm Capacitation and Activates CatSper Channel in Spermatozoa  
553 from the Rhesus Macaque. *Biol Reprod* 93, 130.

554 Tamburrino, L., Marchiani, S., Minetti, F., Forti, G., Muratori, M., and Baldi, E. (2014). The CatSper calcium  
555 channel in human sperm: relation with motility and involvement in progesterone-induced acrosome reaction.  
556 *Hum Reprod* 29, 418-428.

557 Tamburrino, L., Marchiani, S., Vicini, E., Muciaccia, B., Cambi, M., Pellegrini, S., Forti, G., Muratori, M., and  
558 Baldi, E. (2015). Quantification of CatSper1 expression in human spermatozoa and relation to functional  
559 parameters. *Hum Reprod* 30, 1532-1544.

560 Tavares, R.S., Mansell, S., Barratt, C.L., Wilson, S.M., Publicover, S.J., and Ramalho-Santos, J. (2013). p,p'-DDE  
561 activates CatSper and compromises human sperm function at environmentally relevant concentrations. *Hum*  
562 *Reprod* 28, 3167-3177.

563 Visconti, P.E., Moore, G.D., Bailey, J.L., Leclerc, P., Connors, S.A., Pan, D.Y., Oldsclarke, P., and Kopf, G.S.  
564 (1995). Capacitation of Mouse Spermatozoa .2. Protein-Tyrosine Phosphorylation and Capacitation Are  
565 Regulated by a Camp-Dependent Pathway. *Development* 121, 1139-1150.

566 Wennemuth, G., Carlson, A.E., Harper, A.J., and Babcock, D.F. (2003a). Bicarbonate actions on flagellar and Ca<sup>2+</sup>-  
567 channel responses: initial events in sperm activation. *Development* 130, 1317-1326.

568 Wennemuth, G., Carlson, A.E., Harper, A.J., and Babcock, D.F. (2003b). Bicarbonate actions on flagellar and Ca<sup>2+</sup>-  
569 channel responses: initial events in sperm activation. *Development* 130, 1317-1326.

570 Williams, H.L., Mansell, S., Alasmari, W., Brown, S.G., Wilson, S.M., Sutton, K.A., Miller, M.R., Lishko, P.V.,  
571 Barratt, C.L., Publicover, S.J., *et al.* (2015). Specific loss of CatSper function is sufficient to compromise  
572 fertilizing capacity of human spermatozoa. *Hum Reprod* 30, 2737-2746.

573 Xia, J., Reigada, D., Mitchell, C.H., and Ren, D. (2007). CATSPER channel-mediated Ca<sup>2+</sup> entry into mouse sperm  
574 triggers a tail-to-head propagation. *Biol Reprod* 77, 551-559.

575 Xie, F., Garcia, M.A., Carlson, A.E., Schuh, S.M., Babcock, D.F., Jaiswal, B.S., Gossen, J.A., Esposito, G., van  
576 Duin, M., and Conti, M. (2006). Soluble adenylyl cyclase (sAC) is indispensable for sperm function and  
577 fertilization. *Dev Biol* 296, 353-362.

578 Yanagimachi, R. (1994). Fertility of mammalian spermatozoa: its development and relativity. *Zygote* 2, 371-372.

579 Zhang, Y., Malekpour, M., Al-Madani, N., Kahrizi, K., Zanganeh, M., Lohr, N.J., Mohseni, M., Mojahedi, F.,  
580 Daneshi, A., Najmabadi, H., *et al.* (2007). Sensorineural deafness and male infertility: a contiguous gene deletion  
581 syndrome. *J Med Genet* 44, 233-240.

582

583 **Acknowledgments:** We thank Sabine Forsthoff and Jolanta Körber-Naprodzka for technical  
584 support and U. Benjamin Kaupp and Dagmar Wachten for critical reading of the manuscript.

585 **Funding:** This work was supported by the German Research Foundation (CRU326 to T.S. and  
586 F.T.), the National Basic Research Program of China (973 Program, No. 2015CB943003 to  
587 X.H.Z.) and National Natural Science Foundation of China (No. 31671204 to X.H.Z.). T.W.  
588 received funding by the Ph.D. Overseas Study Program of Nanchang University.

589 **Author contributions:** T.S., C.B., X.H.Z., and T.W. conceived the project. All authors designed  
590 research, performed experiments, acquired, analyzed, and/or interpreted data. T.S., C.B., and  
591 T.W. wrote the manuscript. All authors revised the manuscript critically for important  
592 intellectual content, and approved the manuscript.

593 **Competing interests:** The authors declare no conflict of interest.

594 **Data and materials availability:** All data are present in the main text, figures, and the  
595 supplementary material.



596  
597

## Figures

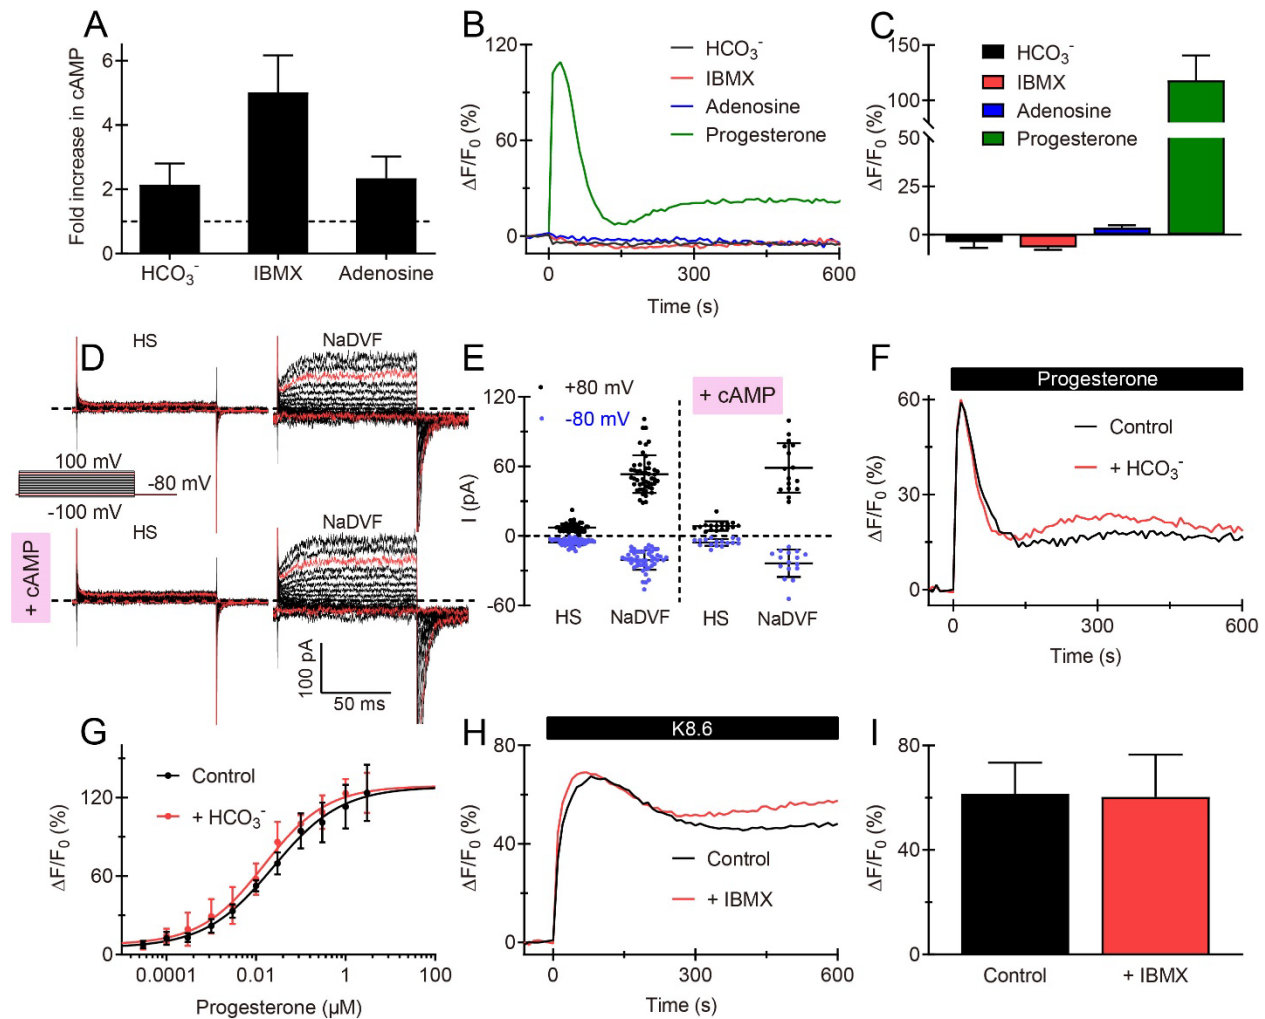

598

599

600 **Figure 1 Human CatSper is not activated by intracellular cAMP.** (A) Changes in total cAMP  
601 content in human sperm upon increasing bicarbonate from 0 mM to 25 mM HCO<sub>3</sub><sup>-</sup>, or by IBMX  
602 (0.5 mM) or adenosine (0.1 mM) in the presence of 4 mM HCO<sub>3</sub><sup>-</sup>. Dotted black line = 1 (control)  
603 (n = 3). (B) Representative Ca<sup>2+</sup> signals evoked by increasing HCO<sub>3</sub><sup>-</sup> from 0 to 25 mM, or by  
604 application of IBMX (0.5 mM), adenosine (0.1 mM), or progesterone (10 μM) in the presence of  
605 4 mM bicarbonate. [Ca<sup>2+</sup>]<sub>i</sub> was monitored using a fluorescence plate reader (Strunker et al.,  
606 2011). Sperm were loaded with the fluorescent Ca<sup>2+</sup> indicator Fluo-4. ΔF/F<sub>0</sub> (%) indicates the  
607 percent change in fluorescence (ΔF) with respect to the mean basal fluorescence (F<sub>0</sub>) before  
608 application of stimulants at t = 0. (C) Mean amplitude of Ca<sup>2+</sup> signals from B (n ≥ 3). (D)  
609 Representative whole-cell currents recorded from a human sperm cell at pH<sub>i</sub> 7.3 in extracellular  
610 solution containing Mg<sup>2+</sup> and Ca<sup>2+</sup> (HS) and during perfusion with Na<sup>+</sup>-based divalent-free bath  
611 solution (NaDVF). Currents were evoked by stepping the membrane voltage from -100 to +100  
612 mV (step 10 mV) from a holding potential of -80 mV in the absence (upper panel) or presence

613 (lower panel) of cAMP (1 mM) in the pipette. Dotted black line: zero current level. Red traces:  
 614 currents at +80 mV and -80 mV. (E) Steady-state current amplitudes at +80 mV and -80 mV in  
 615 HS and NaDVf in the absence (n = 50, left) and presence of cAMP (1 mM) in the pipette (n =  
 616 16; right). (F) Ca<sup>2+</sup> signals evoked by progesterone (10 nM) in sperm bathed in 0 (control) or 25  
 617 mM HCO<sub>3</sub><sup>-</sup>. (G) Dose-response relationship for progesterone in the absence (control; EC<sub>50</sub> = 23  
 618 ± 4 nM) and presence of HCO<sub>3</sub><sup>-</sup> (EC<sub>50</sub> = 19 ± 19 nM) (n = 4). (H) Ca<sup>2+</sup> signals in sperm bathed in  
 619 4 mM HCO<sub>3</sub><sup>-</sup> evoked by a simultaneous alkalization and depolarization (K8.6) in the absence  
 620 (control) and presence of IBMX (0.5 mM). (I) Mean amplitude of Ca<sup>2+</sup> signals from (H) (n = 4).  
 621  
 622

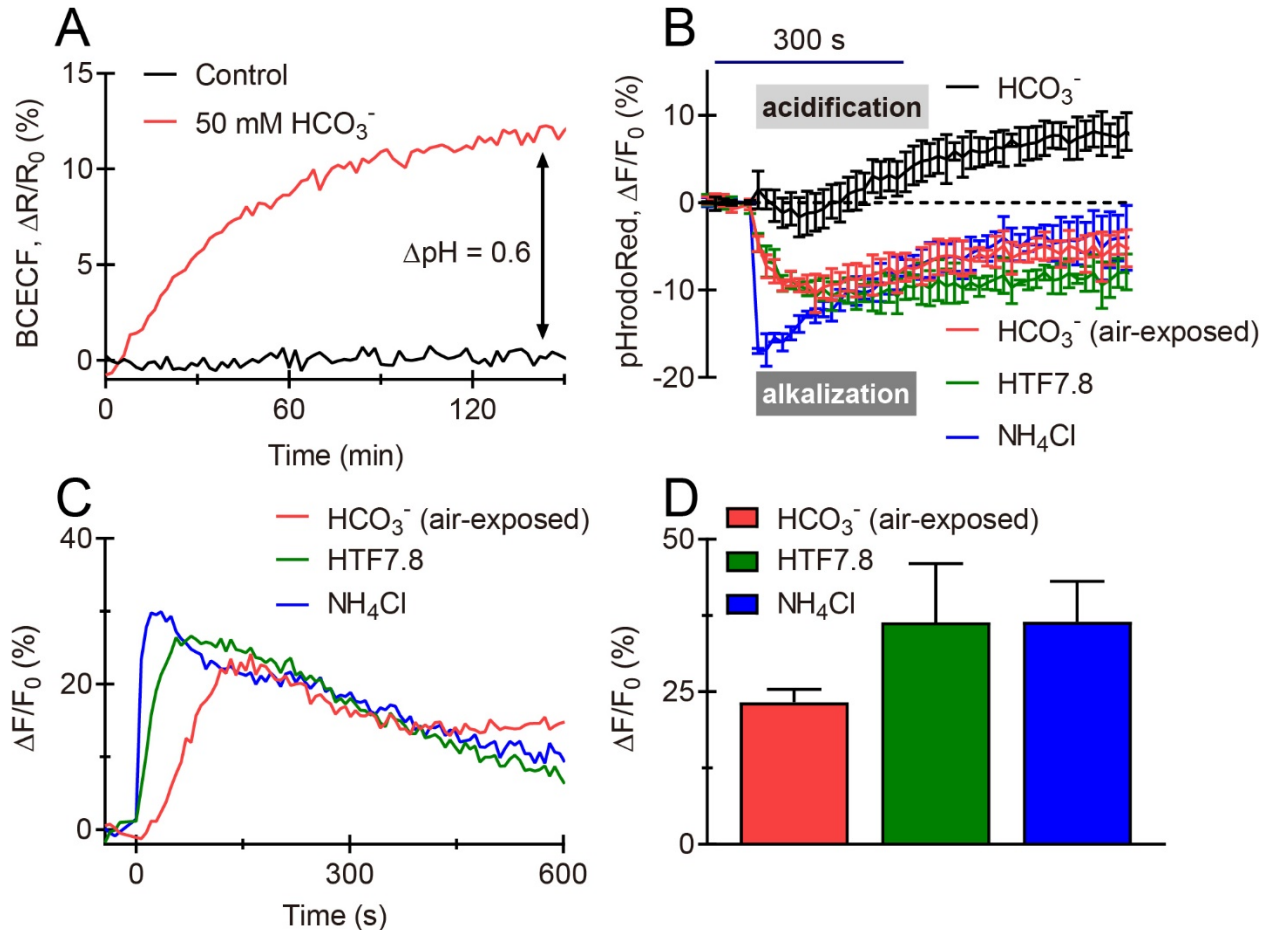

623  
 624

625 **Figure 2 Bicarbonate is prone to evoke alkaline-induced Ca<sup>2+</sup> influx via CatSper (A)**  
 626 Changes in the pH of HTF buffer in the absence (control) and presence of HCO<sub>3</sub><sup>-</sup> (50 mM) at  
 627 ambient air, measured with the fluorescent pH-indicator BCECF. (B) pH<sub>i</sub> changes evoked by pH-  
 628 controlled HTF containing HCO<sub>3</sub><sup>-</sup> (25 mM), air-exposed, alkaline HTF containing HCO<sub>3</sub><sup>-</sup> (25  
 629 mM), alkaline HCO<sub>3</sub><sup>-</sup>-free HTF (pH 7.8, HTF7.8), and NH<sub>4</sub>Cl (5 mM) in human sperm loaded  
 630 with the fluorescent pH indicator pHrodoRed. Dotted black line indicates Y = 0 (n = 3). (C) Ca<sup>2+</sup>  
 631 signals evoked by air-exposed, alkaline HTF containing HCO<sub>3</sub><sup>-</sup> (25 mM), HTF7.8, and NH<sub>4</sub>Cl (5  
 632 mM). (D) Mean amplitude of Ca<sup>2+</sup> signals from (C) (n = 3).

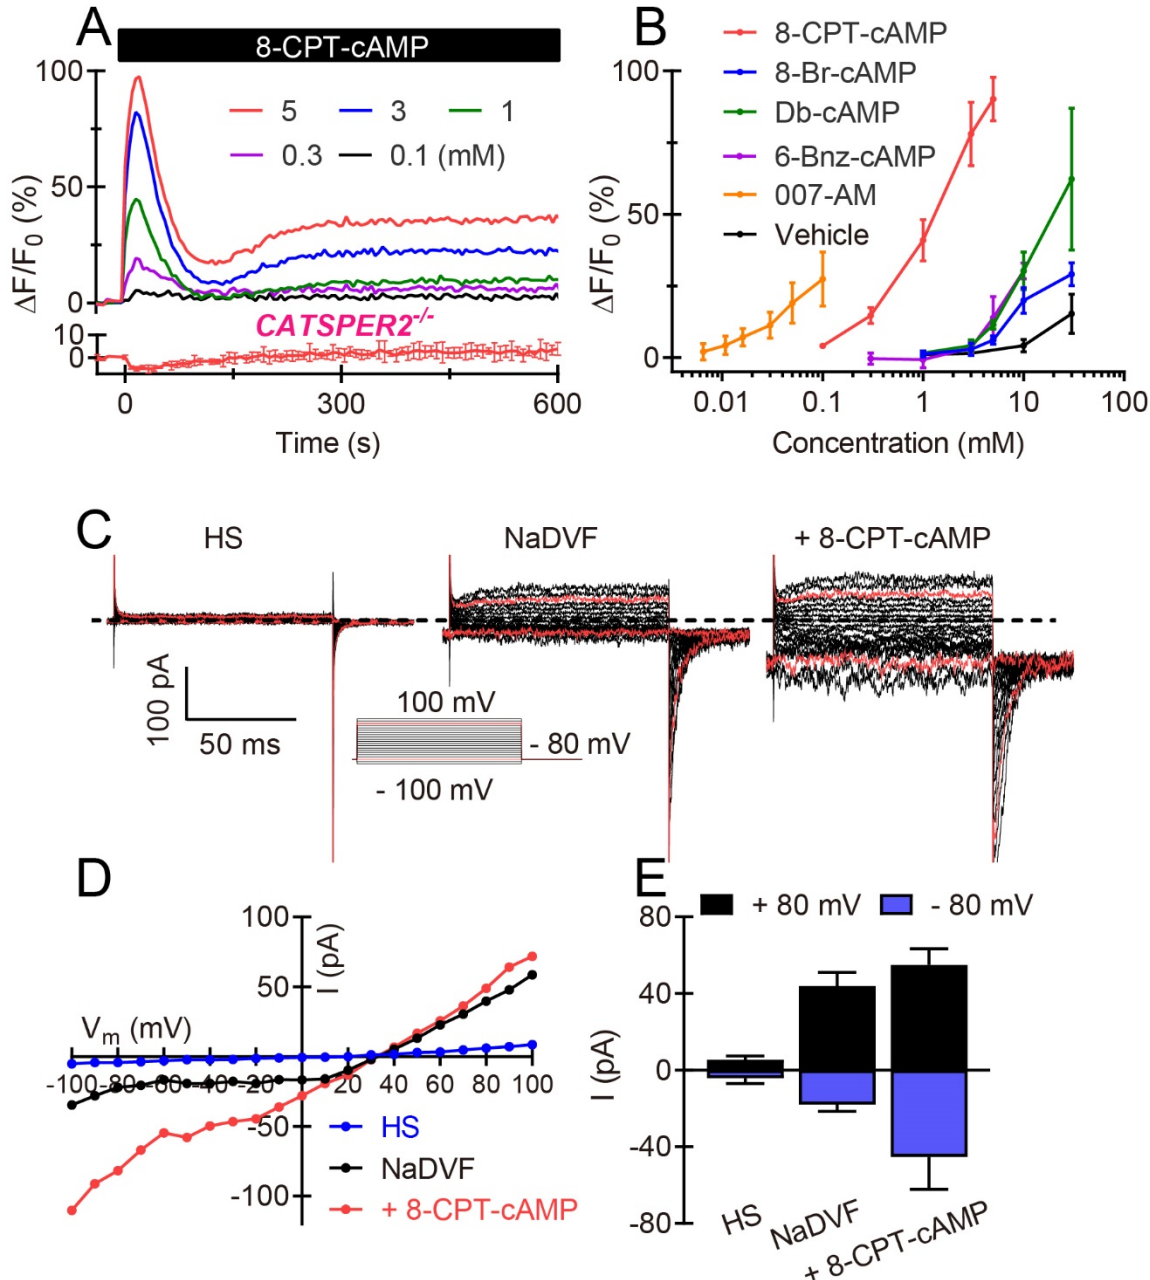

633

634 **Figure 3 Membrane-permeable cAMP analogs activate CatSper in human sperm.** (A)

635 Representative  $\text{Ca}^{2+}$  signals evoked by 8-CPT-cAMP in sperm from a healthy donor (upper

636 panel), and averaged  $\text{Ca}^{2+}$  signal (lower panel,  $n = 3$ ) in sperm lacking functional CatSper

637 channels (*CATSPER2<sup>-/-</sup>*). (B) Mean amplitudes of  $\text{Ca}^{2+}$  signals evoked by membrane-permeable

638 cAMP analogs and by the vehicle (NaCl) ( $n = 3$ ). (C) Representative whole-cell currents

639 recorded from human sperm at  $\text{pH}_i 7.3$  in extracellular solution containing  $\text{Ca}^{2+}$  and  $\text{Mg}^{2+}$  (HS),

640 in divalent-free  $\text{Na}^+$ -based bath solution (NaDVF), and during perfusion with NaDVF containing

641 8-CPT-cAMP (5 mM). Dotted black line: zero current level. Red traces: currents at +80 mV and

642 -80 mV. (D) Steady-state current-voltage relationship from (C). (E) Mean current amplitudes at

643 +80 mV and -80 mV in HS, in NaDVF, and in NaDVF containing 5 mM 8-CPT-cAMP ( $n = 8$ ).

644



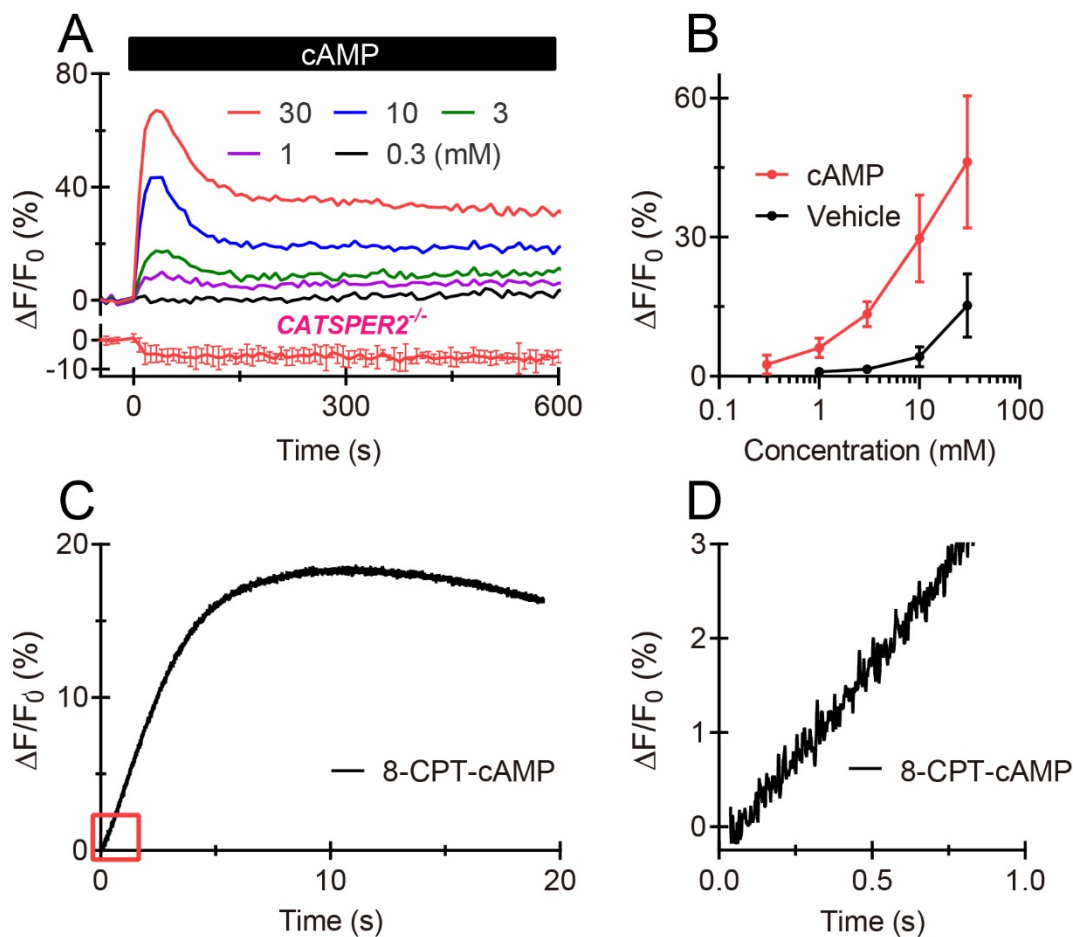

645

646 **Figure 4 Activation of CatSper by extracellular cAMP and kinetics of the 8-CPT-cAMP-**  
647 **evoked  $Ca^{2+}$  response in human sperm. (A)** Representative  $Ca^{2+}$  signals evoked by cAMP in  
648 sperm from a healthy donor (upper panel), and averaged  $Ca^{2+}$  signal (lower panel,  $n = 3$ ) in  
649 sperm lacking functional CatSper channels ( $CATSPER2^{-/-}$ ). (B) Mean amplitudes of  $Ca^{2+}$  signals  
650 evoked by cAMP ( $n = 4$ ) and the vehicle (NaCl) ( $n = 3$ ). (C)  $Ca^{2+}$  signal evoked by rapid mixing  
651 of sperm with 8-CPT-cAMP (5 mM) in a stopped-flow apparatus. (D) Onset of the 8-CPT-  
652 cAMP-evoked  $Ca^{2+}$  signal from (C) shown on an extended time scale.

653

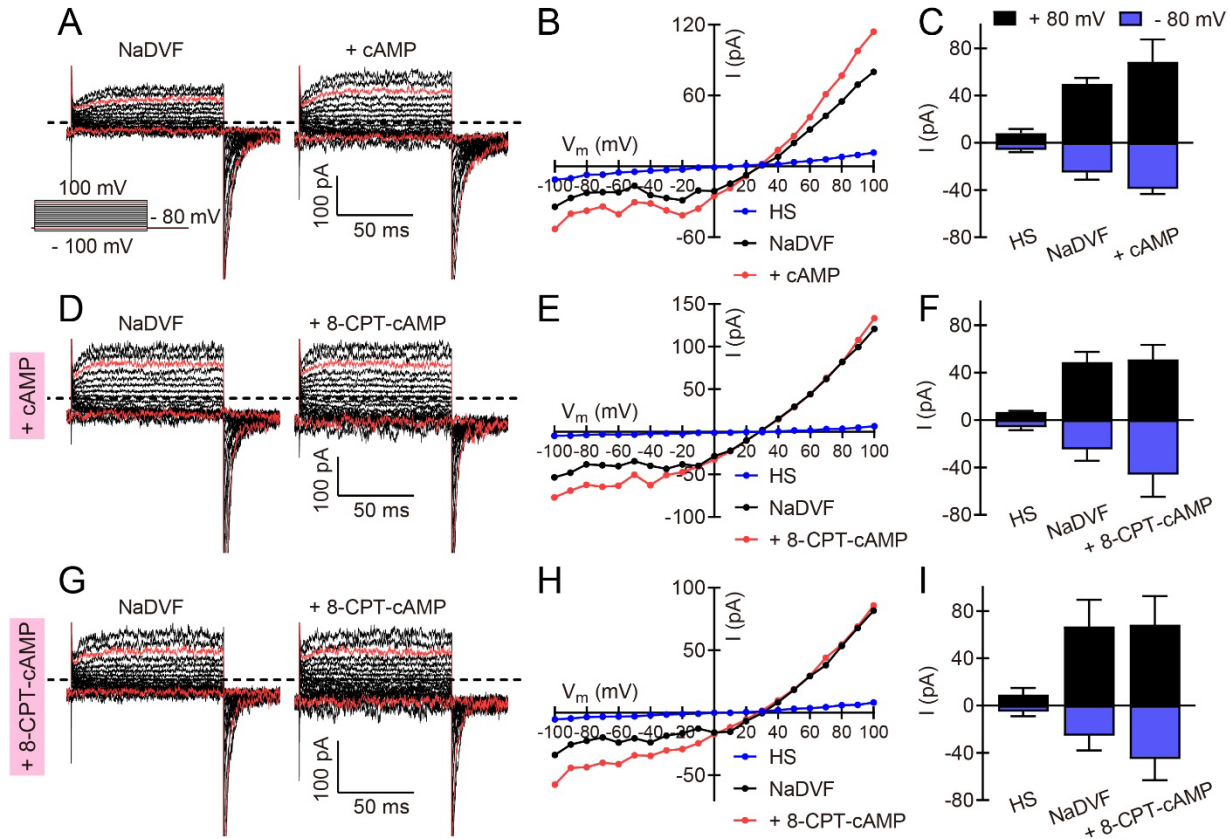

654

655 **Figure 5 cAMP and 8-CPT-cAMP activate human CatSper from the outside. (A, D, and G)**  
 656 Representative whole-cell currents at pH<sub>i</sub> 7.3 in divalent-free Na<sup>+</sup>-based bath solution (NaDVF)  
 657 and in NaDVF containing 10 mM cAMP (A) or 5 mM 8-CPT-cAMP (D and G). Currents were  
 658 evoked in the absence (A) or in the presence of 1 mM cAMP (D) or 5 mM 8-CPT-cAMP (G) in  
 659 the pipette. Dotted black line: zero current level. Red traces: currents at +80 mV and -80 mV. (B,  
 660 E, and H) Steady-state current-voltage relationships from (A), (D), and (G), respectively. (C, F,  
 661 and I) Mean current amplitudes at +80 mV and -80 mV in HS, in NaDVF, and in NaDVF  
 662 containing 10 mM cAMP (C, n = 4) or 5 mM 8-CPT-cAMP (F, n = 8; I, n = 4). Currents were  
 663 evoked in the absence (C) or presence of 1 mM cAMP (F) or 5 mM 8-CPT-cAMP (I) in the  
 664 pipette.

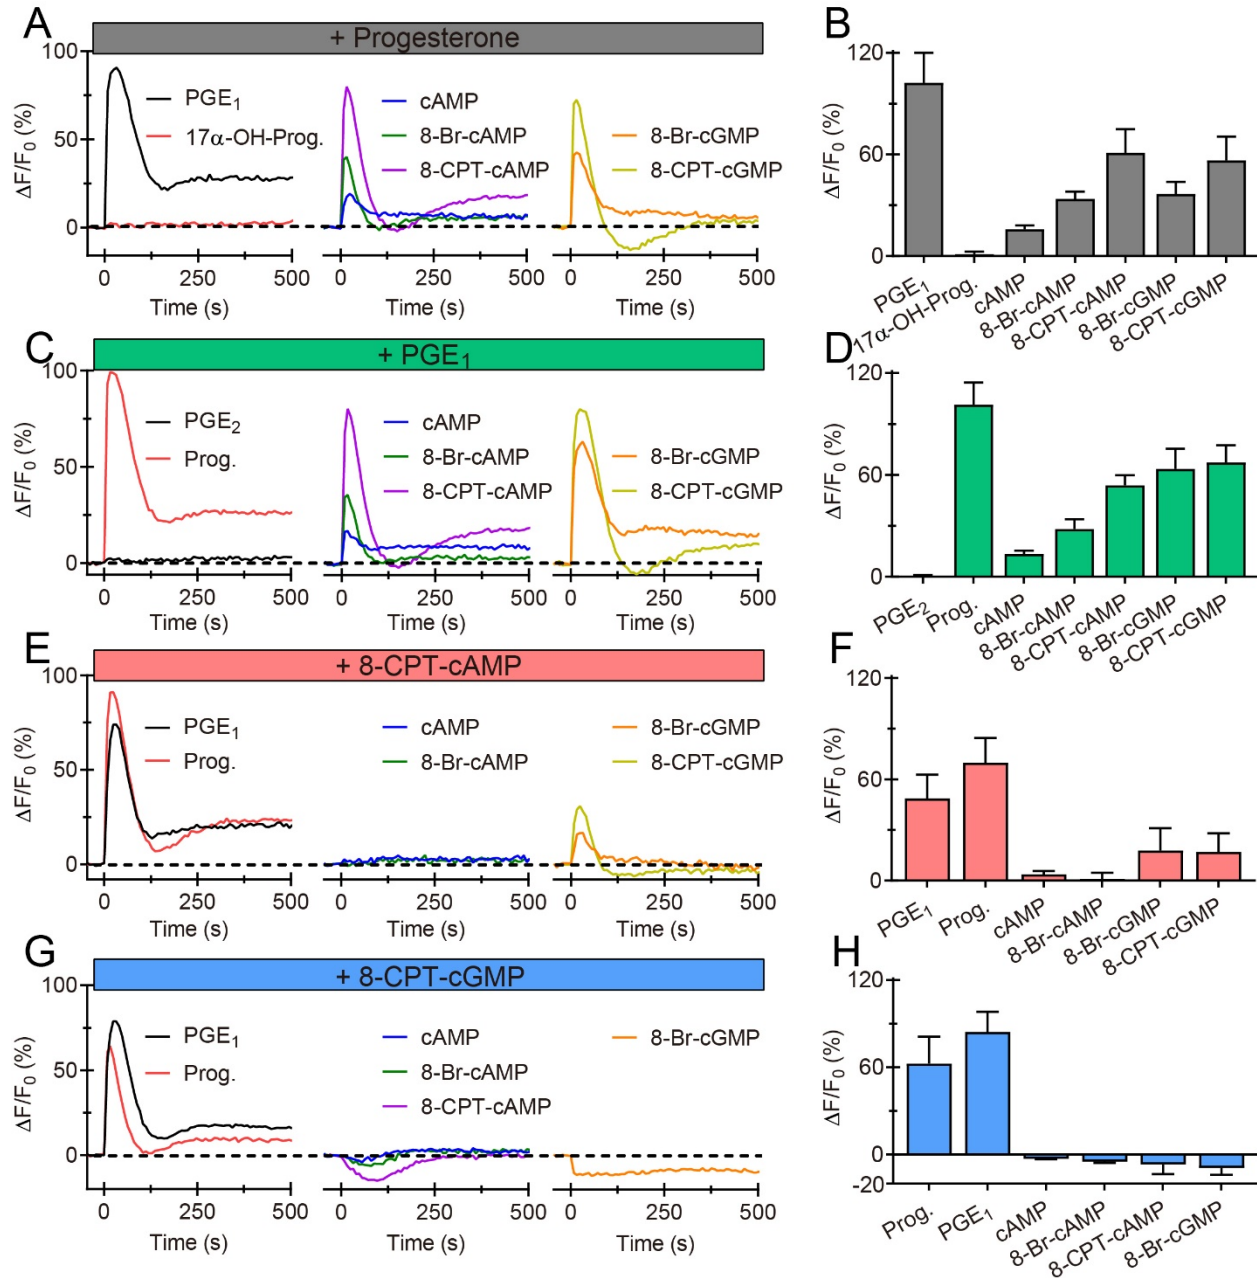

665

666 **Figure 6 Cyclic nucleotides, steroids, and prostaglandins activate human CatSper via three**  
 667 **distinct binding sites. (A, B)** Representative Ca<sup>2+</sup> signals (A) and mean signal amplitudes (B; n  
 668 ≥ 3) evoked by 17α-OH-Progesterone (2 μM), PGE<sub>1</sub> (2 μM), cAMP (10 mM), 8-Br-cAMP (10  
 669 mM), 8-CPT-cAMP (5 mM), 8-Br-cGMP (10 mM), and 8-CPT-cGMP (5 mM) in sperm bathed  
 670 in progesterone (10 μM). **(C, D)** Representative Ca<sup>2+</sup> signals and mean signal amplitudes (n ≥ 3)  
 671 evoked by PGE<sub>2</sub> (2 μM), progesterone (2 μM), and the indicated cyclic nucleotides in sperm  
 672 bathed in PGE<sub>1</sub> (2 μM). **(E, F)** Representative Ca<sup>2+</sup> signals and mean signal amplitudes (n ≥ 3)  
 673 evoked by PGE<sub>1</sub>, progesterone, and the indicated cyclic nucleotides in sperm bathed in 8-CPT-  
 674 cAMP (5 mM), **(G, H)** Representative Ca<sup>2+</sup> signals and mean signal amplitudes (n ≥ 3) evoked  
 675 by PGE<sub>1</sub>, progesterone, and the indicated cyclic nucleotides in sperm bathed in 8-CPT-cGMP (5  
 676 mM).

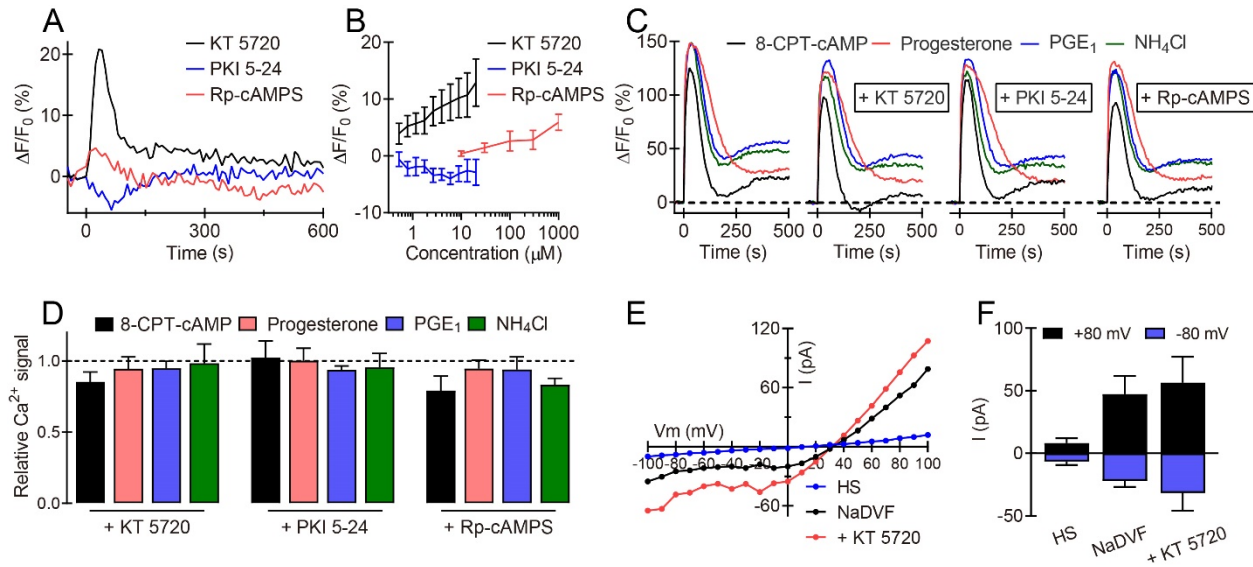

677

678 **Figure 7 Action of PKA inhibitors on CatSper in human sperm.** (A) Representative Ca<sup>2+</sup>  
 679 signals evoked by KT 5720 (20  $\mu\text{M}$ ), PKI 5-24 (20  $\mu\text{M}$ ), and Rp-cAMPS (1 mM). (B) Mean  
 680 amplitudes of Ca<sup>2+</sup> signals evoked by KT 5720, PKI 5-24, and Rp-cAMPS (n  $\geq$  3). (C) Ca<sup>2+</sup>  
 681 signals evoked by 8-CPT-cAMP (5 mM), progesterone (10  $\mu\text{M}$ ), PGE<sub>1</sub> (10  $\mu\text{M}$ ), and NH<sub>4</sub>Cl (10  
 682 mM), in the absence and presence of KT 5720 (20  $\mu\text{M}$ ), PKI 5-24 (20  $\mu\text{M}$ ), or Rp-cAMPS (1  
 683 mM). (D) Mean amplitude of Ca<sup>2+</sup> signals in the presence of KT 5720 (20  $\mu\text{M}$ ), PKI 5-24 (20  
 684  $\mu\text{M}$ ), or Rp-cAMPS (1 mM) relative to the amplitude evoked in the absence of any drug (n  $\geq$  4).  
 685 (E) Representative steady-state current-voltage relationship of currents recorded at pH<sub>i</sub> of 7.3 in  
 686 extracellular solution containing Ca<sup>2+</sup> and Mg<sup>2+</sup> (HS), in divalent-free Na<sup>+</sup>-based bath solution  
 687 (NaDVF), and in NaDVF containing KT 5720 (20  $\mu\text{M}$ ). (F) Mean current amplitudes at +80 mV  
 688 and -80 mV recorded in HS, in NaDVF, and in NaDVF containing 20  $\mu\text{M}$  KT 5720 (n = 5).

689

690

691

692

693

694

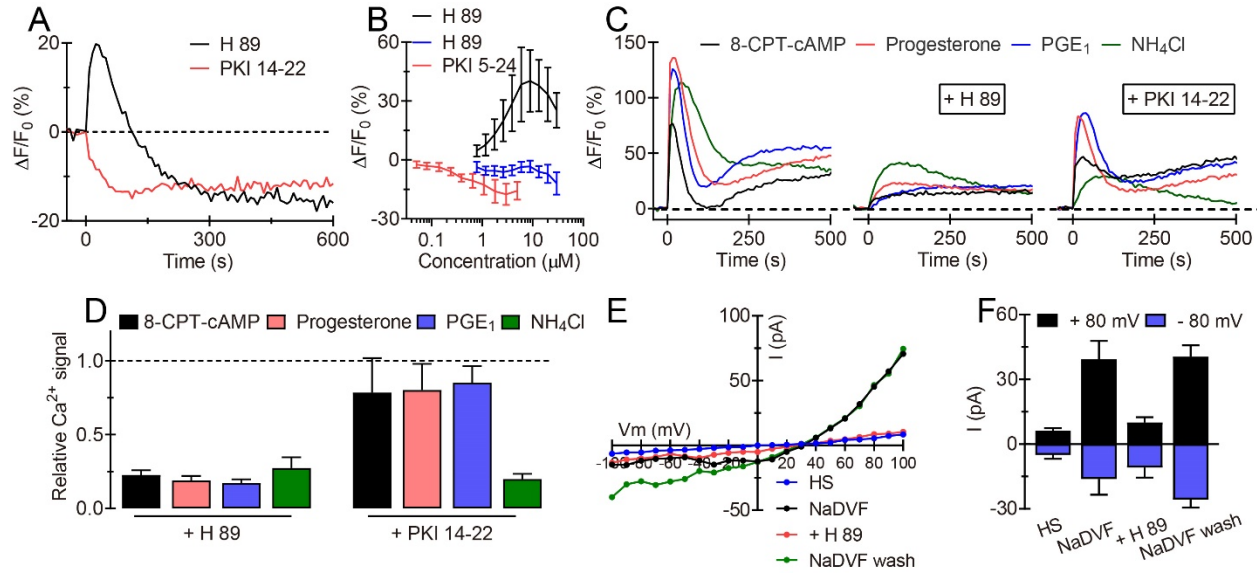

695

696 **Figure 8 The PKA inhibitors H89 and PKI 14-22 inhibit human CatSper.** (A)  
 697 Representative Ca<sup>2+</sup> signals evoked by H89 (30  $\mu\text{M}$ ) and PKI 14-22 (5  $\mu\text{M}$ ). (B) Mean amplitude  
 698 of Ca<sup>2+</sup> signals evoked by H89 (black, peak phase; blue, sustained phase) and PKI 14-22 (n  $\geq$  6).  
 699 (C) Ca<sup>2+</sup> signals evoked by 8-CPT-cAMP (5 mM), progesterone (10  $\mu\text{M}$ ), PGE<sub>1</sub> (10  $\mu\text{M}$ ), and  
 700 NH<sub>4</sub>Cl (10 mM) in the absence and presence of H89 (30  $\mu\text{M}$ ) or PKI 14-22 (5  $\mu\text{M}$ ). (D) Mean  
 701 amplitude of Ca<sup>2+</sup> signals in the presence of H89 or PKI 14-22 relative to the amplitude evoked  
 702 in the absence of any drug (n  $\geq$  4). (E) Representative steady-state current-voltage relationship of  
 703 currents recorded at pH<sub>i</sub> 7.3 in extracellular solution containing Ca<sup>2+</sup> and Mg<sup>2+</sup> (HS), in divalent-  
 704 free Na<sup>+</sup>-based bath solution (NaDVF), and in NaDVF containing H89 (30  $\mu\text{M}$ ). (F) Mean  
 705 current amplitudes at +80 mV and -80 mV in HS, in NaDVF, and in NaDVF containing H89 (n  $\geq$   
 706 3).

707

708

709

710



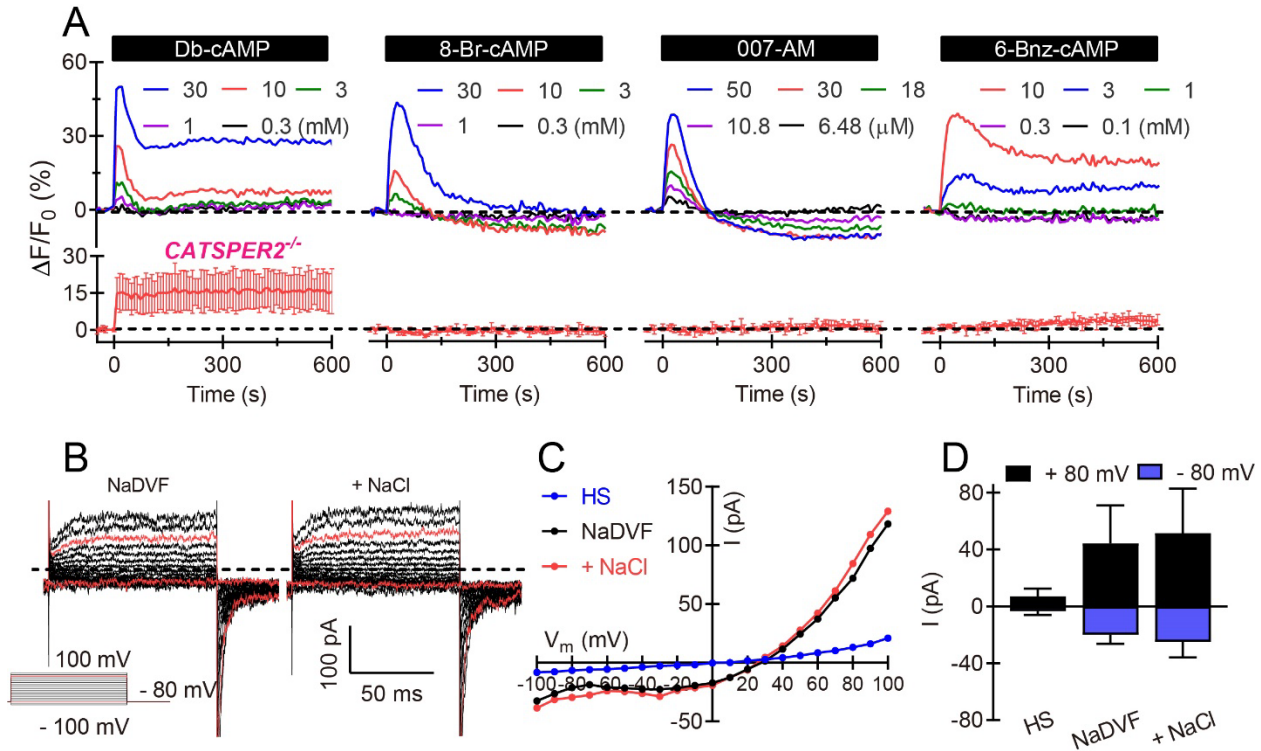

711

712 **Supplementary Figure 1 cAMP analogs evoke Ca<sup>2+</sup> signals in human sperm.** (A)  
 713 Representative Ca<sup>2+</sup> signals evoked by Db-cAMP, 8-Br-cAMP, 8-pCPT-2-O-Me-cAMP (e.g.  
 714 007-AM), and 6-Bnz-cAMP in sperm from healthy donors (upper panel), and averaged Ca<sup>2+</sup>  
 715 signal (lower panels, n = 3) in sperm lacking functional CatSper channels (*CATSPER2<sup>-/-</sup>*). (B)  
 716 Representative whole-cell currents at pH<sub>i</sub> 7.3 in divalent-free Na<sup>+</sup>-based bath solution (NaDVF)  
 717 and in NaDVF containing additional 5 mM NaCl. Dotted black line: zero current level. Red  
 718 traces: currents at +80 mV and -80 mV. (C) Steady-state current-voltage relationship from (B)  
 719 and in extracellular solution containing Ca<sup>2+</sup> and Mg<sup>2+</sup> (HS) indicated as a control. (D) Mean  
 720 current amplitudes at +80 mV and -80 mV in HS, in NaDVF, and in NaDVF containing  
 721 additional 5 mM NaCl (n = 3).

722

723

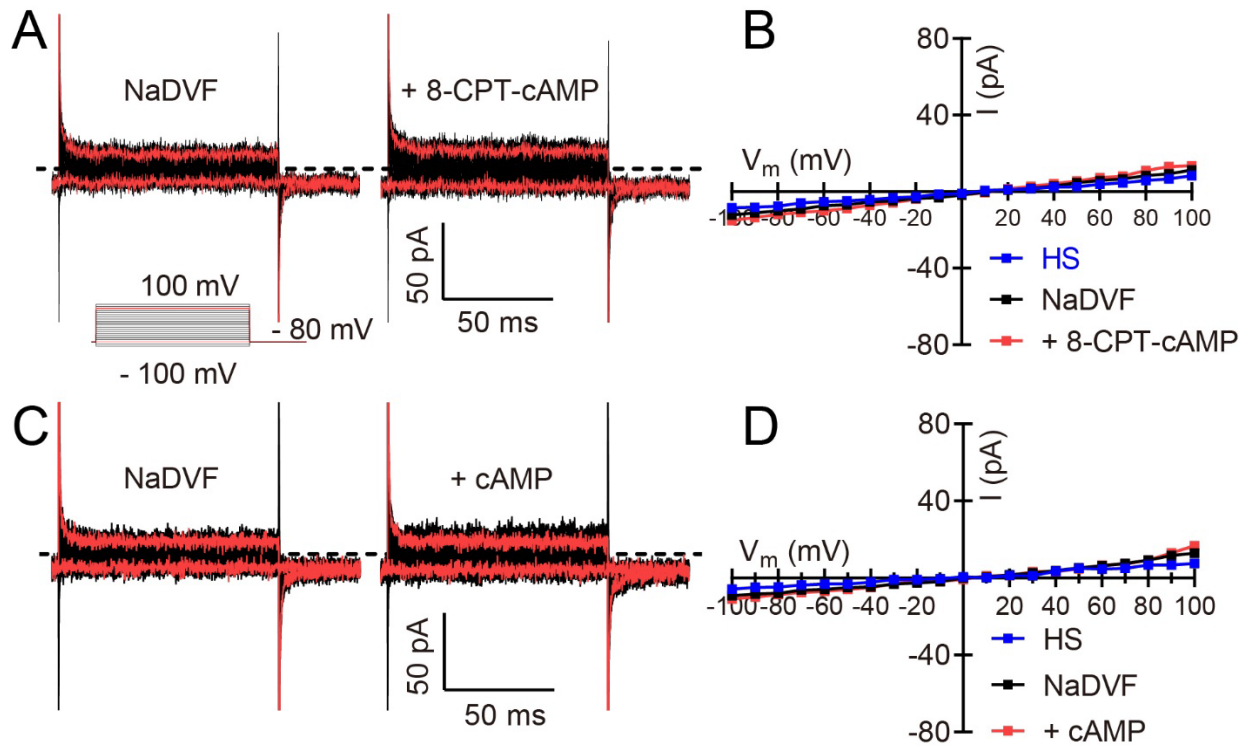

724

725 **Supplementary Figure 2 Action of 8-CPT-cAMP and cAMP in CatSper-deficient human**  
726 **sperm.** (A, C) Representative whole-cell currents at pH<sub>i</sub> 7.3 recorded from sperm lacking  
727 functional CatSper channels (*CATSPER2*<sup>-/-</sup>) in divalent-free Na<sup>+</sup>-based bath solution (NaDVF)  
728 and in NaDVF containing 5 mM 8-CPT-cAMP (A) or 10 mM cAMP (C). Dotted black line: zero  
729 current level. Red traces: currents at +80 mV and -80 mV. (B, D) Steady-state current-voltage  
730 relationship from (A) and (C), respectively, with currents in extracellular solution containing  
731 Ca<sup>2+</sup> and Mg<sup>2+</sup> (HS) indicated as a control.

732

733

734

735

736

737

738

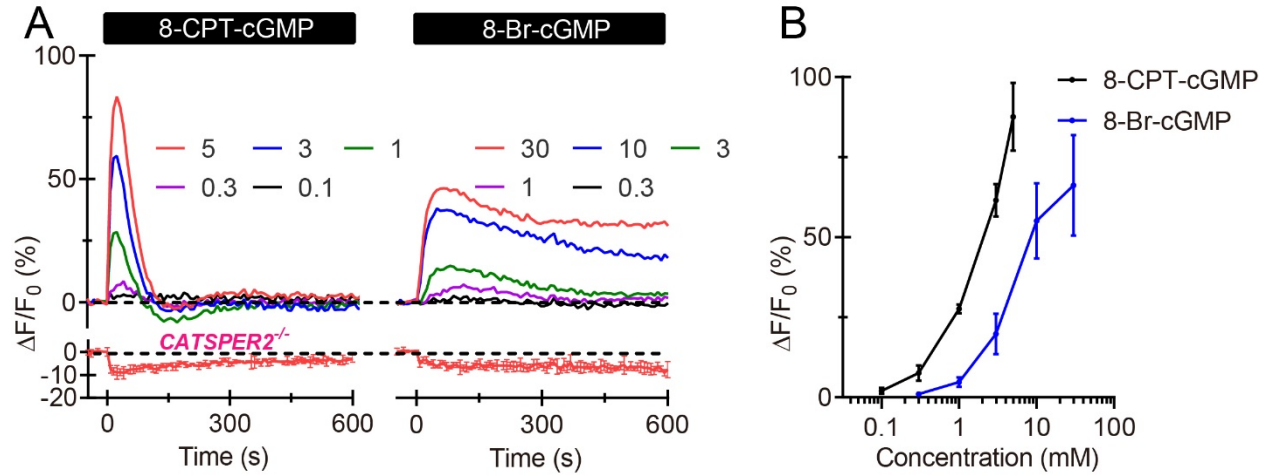

739

740 **Supplementary Figure 3 cGMP analogs activate CatSper in human sperm. (A)**

741 Representative  $Ca^{2+}$  signals evoked by 8-CPT-cGMP and 8-Br-cGMP in sperm from healthy

742 donors and averaged  $Ca^{2+}$  signal (lower panels, n = 3) in sperm lacking functional CatSper

743 channels ( $CATSPER2^{-/-}$ ). (B) Mean amplitudes of  $Ca^{2+}$  signals evoked by 8-CPT-cGMP and 8-

744 Br-cGMP (n = 3) in sperm from healthy donors.

745

746

747



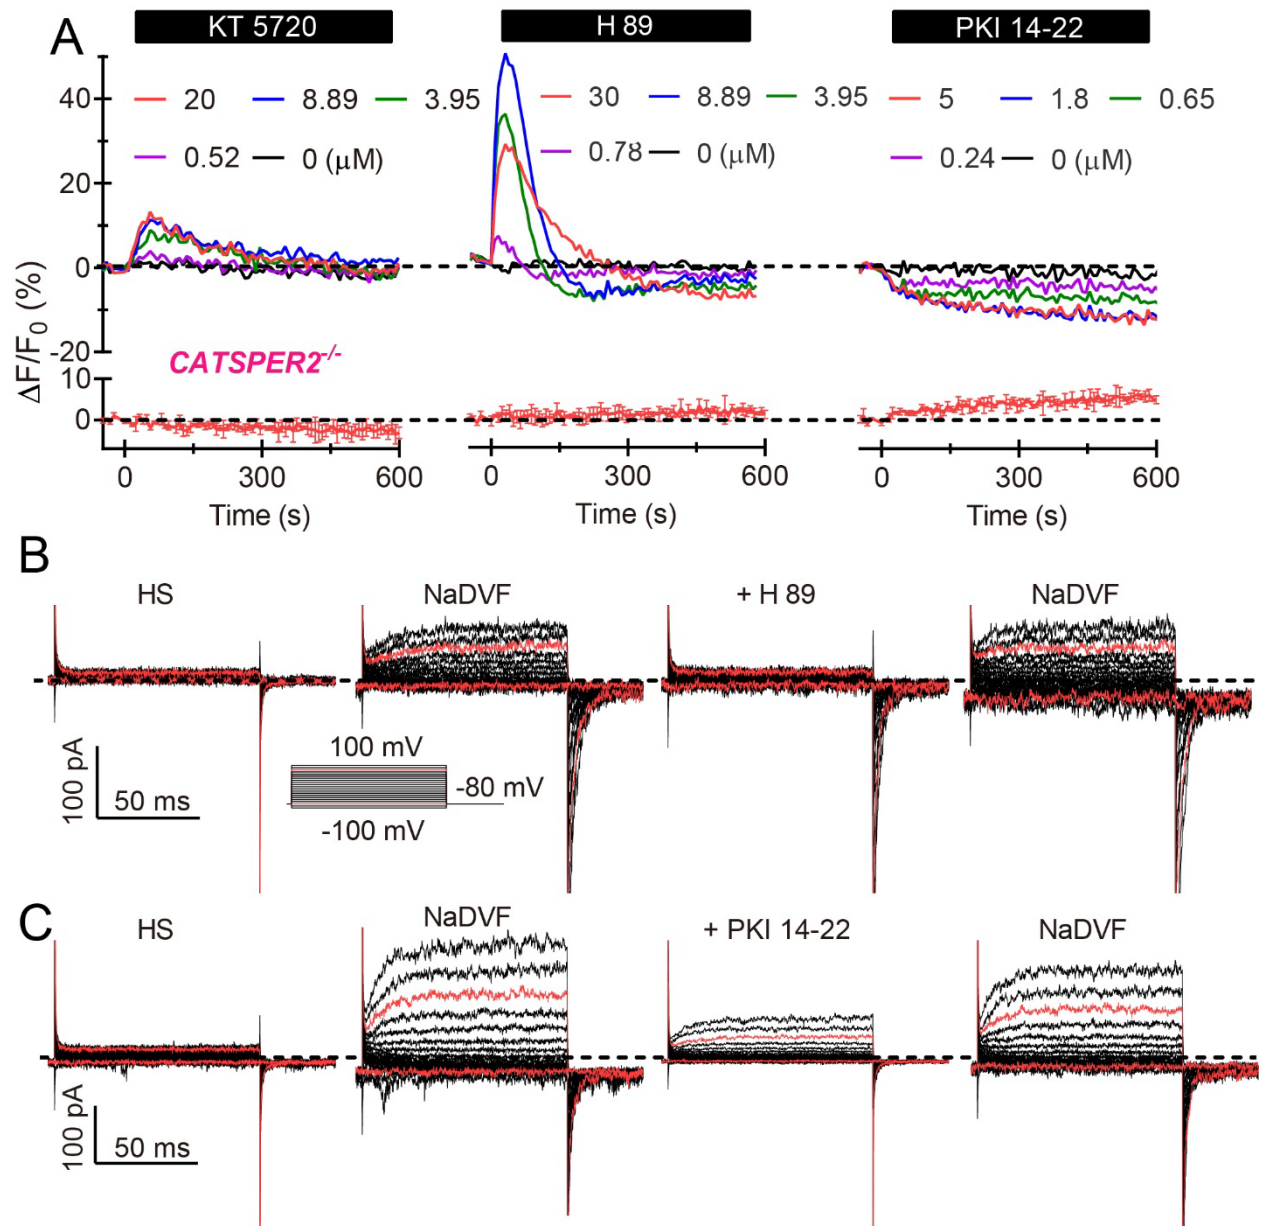

748

749 **Supplementary Figure 4 The actions of PKA inhibitors in human sperm** (A) Representative  
750  $Ca^{2+}$  signals evoked by KT 5720, H 89, and PKI 14-22 in sperm from healthy donors and  
751 averaged  $Ca^{2+}$  signal (lower panels,  $n = 3$ ) in sperm lacking functional CatSper channels  
752 (*CATSPER2<sup>-/-</sup>*). (B and C) Representative whole-cell currents at  $pH_i$  7.3 in extracellular solution  
753 containing  $Ca^{2+}$  and  $Mg^{2+}$  (HS), in divalent-free  $Na^+$ -based bath solution (NaDVF), and in  
754 NaDVF containing 30  $\mu$ M H 89 (B) or 5  $\mu$ M PKI 14-22 (C). Dotted black line: zero current level.  
755 Red traces: currents at +80 mV and -80 mV.

756

757

758

759

760

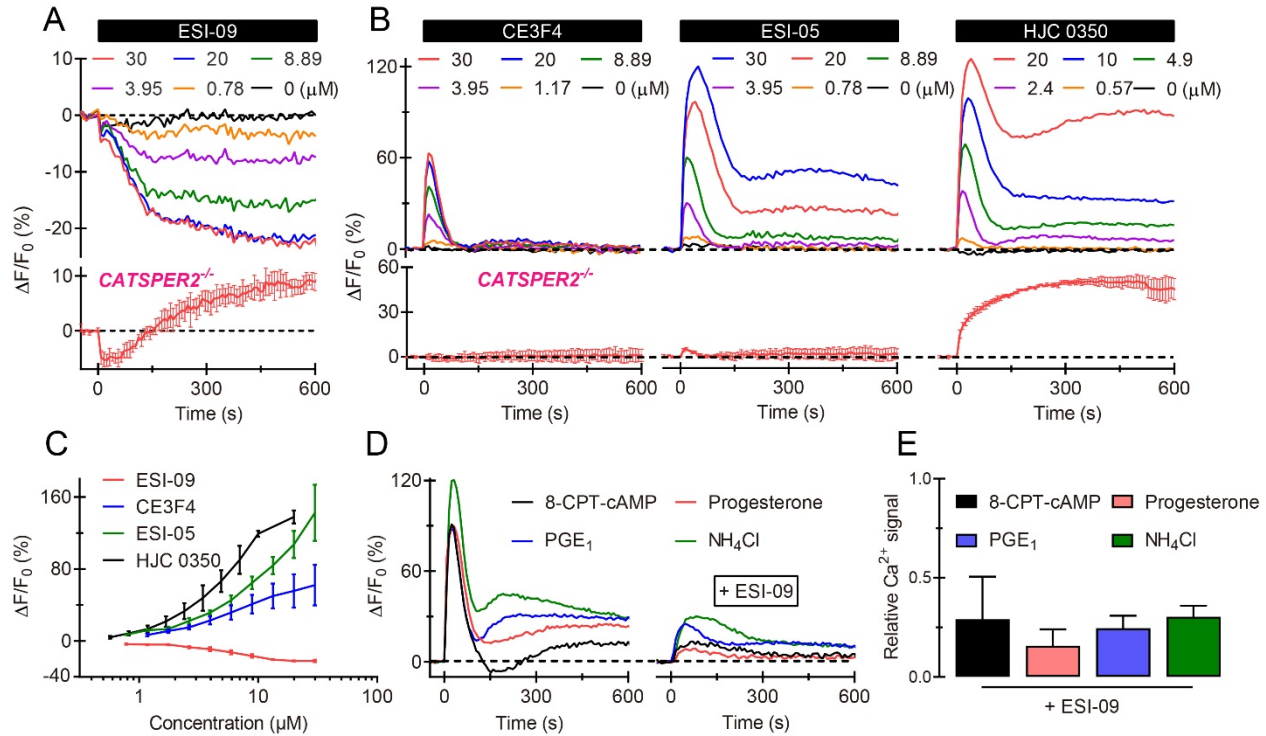

761

762 **Supplementary Figure 5 The action of EPAC inhibitors in human sperm. (A, B)**  
 763 **Representative Ca<sup>2+</sup> signals evoked ESI 09, CE3F4, ESI 05, and HJC 0350 in sperm from**  
 764 **healthy donors and averaged Ca<sup>2+</sup> signal (lower panels, n = 3) in sperm lacking functional**  
 765 **CatSper channels (*CATSPER2<sup>-/-</sup>*). (C) Mean amplitudes of Ca<sup>2+</sup> signals evoked by EPAC**  
 766 **inhibitors (n ≥ 4). (D) Ca<sup>2+</sup> signals evoked by 8-CPT-cAMP (5 mM), progesterone (10 μM),**  
 767 **PGE<sub>1</sub> (10 μM), and NH<sub>4</sub>Cl (10 mM), in the absence and presence of ESI 09 (30 μM). (E) Mean**  
 768 **amplitude of Ca<sup>2+</sup> signals in the presence of ESI 09 (30 μM) relative the amplitude evoked in the**  
 769 **absence of any drug (n ≥ 3).**

770

771

772

773

774

775
